# Supplementary material
Source: Royal Society of Chemistry journal article supplement (doi:10.1039/d5ta09331g)
Supplement: d5ta09331g1.pdf [file d5ta09331g1.pdf]

## Supporting information

### **Benzothiadiazoles Incorporated in a Metal-Organic Framework for improved photocatalysis in Azacycles Synthesis**

Hua Liu,<sup>a</sup> Lang Liu,<sup>\*,b</sup> Yu-Feng Zhang,<sup>a</sup> Ya-Xin Sun,<sup>a</sup> Yi-Ming Liu,<sup>\*,a</sup>

<sup>a</sup> College of Chemical Engineering and Technology, Shanxi Key Laboratory of Catalysis and Energy Coupling, Taiyuan University of Science and Technology, Taiyuan 030024, P. R. China. E-mail: liuyiming01@tyut.edu.cn

<sup>b</sup> College of Pharmacy, Xi'an Medical University, Xi'an 710021 Shaanxi, P. R. China. E-mail: liulang@xiji.edu.cn

<sup>c</sup> College of Environmental Science and Engineering, Taiyuan University of Technology, Taiyuan 030024, P. R. China

## 1. Materials and Methods

Unless otherwise noted, all materials were used as received from commercial sources without further purification. The products phase purity was examined by powder XRD in the angular range of  $2\theta = 5-50^\circ$ , using a Bruker D8 ADVANCE X-ray powder diffractometer (Cu  $K\alpha$ , 1.5418 Å). UV-visible diffuse reflectance spectra were conducted with BaSO<sub>4</sub> pellets on a Lambda750 spectrometer. Ultraviolet-visible spectra were recorded on a Lambda750 spectrophotometer equipped with a xenon discharge lamp. The Fluorescent spectra were recorded on FluoroMax-4 fluorescence spectrometer equipped with a xenon discharge lamp. The electrochemical measurements were performed in a conventional three-electrode cell on a CHI-760E electrochemical workstation (Shanghai Chenhua Instrument Co., Ltd, China). Photocatalytic measurements were conducted on a RLH-18-22 photoreactor instrument (the distance between the lamp and the reaction vessel was 4mm). Electron paramagnetic resonance (EPR) signals were recorded on a Bruker E500-9.5/12 at room temperature under visible-light irradiation using a blue LED (400-470 nm). <sup>1</sup>H NMR and <sup>13</sup>C NMR experiments were performed with a JEOL ECZ400S/L1 spectrometer. Mass spectra were carried out on a Maxis Ultimate 300HPLC·Maxis Ultimate 300hplc.

## 2. Density functional theory calculations

Structures of compounds ATDB, BTDB, IBTDB and TBTDB were optimized and characterized by frequency calculations to be energy minima (zero imaginary frequencies) at the B3LYP<sup>3</sup>/6-31g(d,p) level of density functional theory (DFT). The HOMO-LUMO energies were then obtained from the output files. All calculations were performed with Gaussian 09.<sup>[1]</sup>

## 3. Synthesis and Characterization of organic linker

### 3.1 The synthesis of ATDB

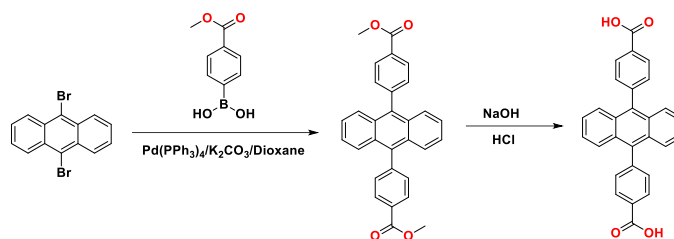

**Scheme S1.** Synthesis of ATDB molecule

9,10-Dibromoanthracene (2.85 g, 8.5 mmol), 4-(methoxycarbonyl)phenylboronic acid (3.8 g, 21.2 mmol),  $K_2CO_3$  (4.2 g, 30 mmol), and catalyst  $[Pd(PPh_3)_4]$  (1.0 g, 0.86 mmol) were dissolved in dioxane (150 mL) under Ar in 250 ml three necked flask. The mixture was stirred at 120 °C for 24 h. Dichloromethane (100 mL) and water (50 mL) were added, the organic layer was separated, and the aqueous layer was extracted with dichloromethane ( $3 \times 20$  mL). The combined organic layers were washed with brine (200 mL), dried over anhydrous  $Na_2SO_4$ , and filtered. The solvent was removed under reduced pressure and the residue was purified by passing through a silica plug with dichloromethane/petroleum ether (1:1) as the eluent to give a light-yellow solid (yield: 87%).  $^1H$  NMR (400 MHz, Chloroform- $d$ )  $\delta$  8.29 (d,  $J = 8.1$  Hz, 4H), 7.61 (dd,  $J = 6.7$ , 3.1 Hz, 4H), 7.57 (d,  $J = 8.0$  Hz, 4H), 7.34 (dd,  $J = 7.0$ , 3.3 Hz, 4H), 4.02 (s, 6H). The solid was mixed with NaOH solution (0.1 M, 150 ml) and refluxed at 100 °C for 12 h. The resulting solution was cooled to room temperature and tuned to pH 5 by HCl. The light yellow precipitate was filtered and dried.  $^1H$  NMR (400 MHz, DMSO- $d_6$ )  $\delta$  13.16 (s, 2H), 8.22 (d,  $J = 8.1$  Hz, 4H), 7.62 (d,  $J = 8.1$  Hz, 4H), 7.58 -7.52 (m, 4H), 7.46 (q,  $J = 3.6$ , 3.2 Hz, 4H).<sup>[2]</sup>

### 3.2 The synthesis of BTDB

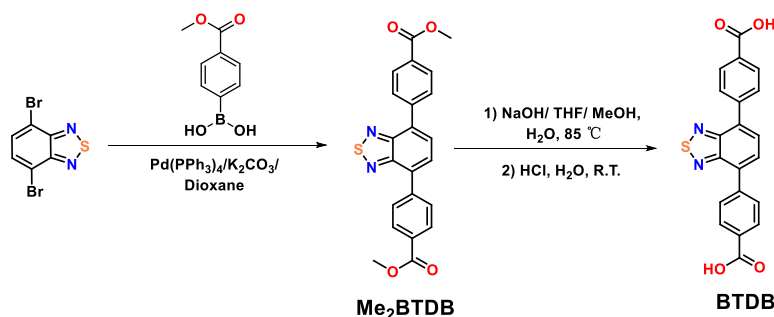

**Scheme S2.** Synthesis of BTDB molecule

4,7-dibromo-2,1,3-benzothiadiazole (1.0 g, 3.4 mmol), methyl 4-boronobenzoate (1.5 g, 8.5 mmol), potassium carbonate (2.6 g, 20.4 mmol) and  $Pd(PPh_3)_4$  (78.6 mg, 0.068

mmol) were added into one 250 mL round-bottle flask containing 80 mL dioxane. The reaction solution was degassed four times. Then the mixture was heated to reflux at 110 °C for 72 h under argon atmosphere. After cooling down to room temperature, the mixture was extracted five times with ethyl acetate, then the organic layers were combined and dried over anhydrous Na<sub>2</sub>SO<sub>4</sub> and the solvent was removed in vacuo. The crude product was purified by silica gel column chromatography to give the target product (yield 83%). <sup>1</sup>H NMR (400 MHz, Chloroform-*d*) δ 8.22 (d, *J* = 7.9 Hz, 4H), 8.07 (d, *J* = 7.7 Hz, 4H), 7.87 (s, 2H), 3.98 (s, 6H). <sup>13</sup>C NMR (101 MHz, CDCl<sub>3</sub>) δ 166.90, 153.90, 141.6, 133.0, 130.0, 129.4, 128.6, 52.4.<sup>[3]</sup>

2.5 mmol compound Me<sub>2</sub>BTDB was added to a solution containing 30 mL CH<sub>3</sub>OH, 30 mL THF and 30 mL water with 1.0 g NaOH. The mixture was heated to reflux at 80 °C overnight. After cooling down to room temperature, the organic solvent was removed under reduced pressure and the resulted aqueous was filtered. Then the filtrate was neutralized using 2M HCl to obtain the precipitate, which was filtered to offer the final product BTDB.<sup>[3]</sup>

### 3.3 The synthesis of TBTDB

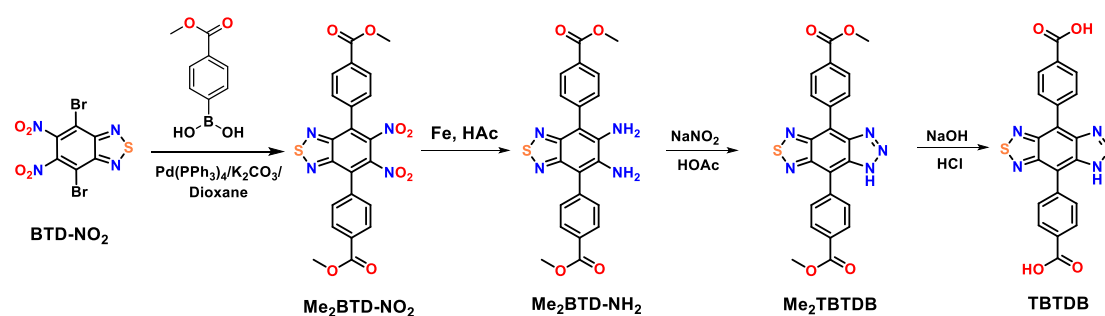

**Scheme S3.** Synthesis of TBTDB molecule

**The synthesis of Me<sub>2</sub>BTD-NO<sub>2</sub>.** BTD-NO<sub>2</sub> (0.65 g, 1.7 mmol), methyl 4-boronobenzoate (0.75 g, 4.25 mmol), potassium carbonate (1.3 g, 10.2 mmol) and Pd(PPh<sub>3</sub>)<sub>4</sub> (39.3 mg, 0.034 mmol) were added into one 100 mL round-bottle flask containing 40 mL dioxane. The reaction solution was degassed four times. Then the mixture was heated to reflux at 110 °C for 72 h under argon atmosphere. After cooling down to room temperature, the mixture was extracted five times with ethyl acetate, then

the organic layers were combined and dried over anhydrous Na<sub>2</sub>SO<sub>4</sub> and the solvent was removed in vacuo. The crude product was purified by silica gel column chromatography to give the target product (yield 89%). <sup>1</sup>H NMR (400 MHz, CDCl<sub>3</sub>) δ 8.24 (d, J = 2.0 Hz, 4H), 7.65 (d, J = 1.9 Hz, 4H), 3.97 (s, 6H). <sup>13</sup>C NMR (101 MHz, CDCl<sub>3</sub>) δ 166.20, 152.70, 142.56, 134.66, 132.11, 130.29, 129.36, 128.77, 52.62.<sup>[4]</sup>

**The synthesis of Me<sub>2</sub>BTD-NH<sub>2</sub>.** A 100 mL round bottom flask was charged with Me<sub>2</sub>BTD-NO<sub>2</sub> (0.5 g, 1.0 mmol), iron powder (0.68 g, 12.1 mmol), and acetic acid (30 mL). The reaction was heated to 100 °C for 2 h, then cooled to room temperature and diluted with water (50 mL). The product was extracted with CH<sub>3</sub>COOC<sub>2</sub>H<sub>5</sub> (3 × 40 mL). The combined organic layers were washed with water and dried over anhydrous Na<sub>2</sub>SO<sub>4</sub>, filtered, and solvent removed under reduced pressure to give the crude product, which was further purified using column chromatograph to give orange solid (yield: 76%). <sup>1</sup>H NMR (400 MHz, DMSO-d<sub>6</sub>) δ 8.11 (d, J = 7.8 Hz, 4H), 7.67 (d, J = 7.8 Hz, 4H), 5.62 (s, 4H), 3.91 (s, 6H).<sup>[4]</sup>

**The synthesis of Me<sub>2</sub>TBTDB.** To a solution of compound 4 (738 mg, 1.7 mmol) in 80 mL acetic acid was added NaNO<sub>2</sub> (300 mg, 4 mmol) at room temperature. The resulting mixture was then stirred at room temperature for 3 h. The reaction mixture was diluted with H<sub>2</sub>O, and extracted with ethyl acetate. The combined organic layers were washed saturated NaHCO<sub>3</sub> aqueous solution, dried over Na<sub>2</sub>SO<sub>4</sub>, and concentrated in vacuo to give a red residue. The residue was purified by chromatography on silica gel column (CH<sub>2</sub>Cl<sub>2</sub>/MeOH =60:1 v/v) to furnish the desired product (yield: 86%).<sup>[5]</sup> <sup>1</sup>H NMR (400 MHz, Trifluoroacetic Acid-d) δ 8.37 (d, J = 7.9 Hz, 4H), 8.06 (d, J = 7.9 Hz, 4H), 4.09 (s, 6H). HRMS Calcd (ESI) m/z for C<sub>22</sub>H<sub>14</sub>N<sub>5</sub>O<sub>4</sub>S: [M-H]<sup>-</sup> 444.0771, Found: 444.0772.

**The synthesis of TBTDB.** The resultant solid was added to a solution containing 10 mL CH<sub>3</sub>OH, 10 mL THF and 10 mL water with 0.3 g NaOH. The mixture was heated to reflux at 90 °C overnight. After cooling down to room temperature, the organic solvent was removed under reduced pressure and the resulted aqueous was filtered. Then the filtrate was neutralized using 2M HCl to obtain the precipitate, which was filtered to offer the final product TBTDB (yield 88%). <sup>1</sup>H NMR (400 MHz,

Trifluoroacetic Acid-*d*)  $\delta$  8.48 (s, 4H), 8.14 (s, 4H). HRMS Calcd (ESI) *m/z* for  $C_{20}H_{10}N_5O_4S$ :  $[M-H]^-$  416.0458, Found: 416.0519.

### 3.4 The synthesis of IBTDB

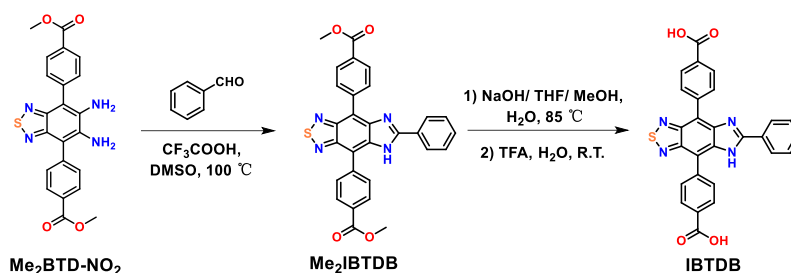

**Scheme S4.** Synthesis of IBTDB molecule

**The synthesis of Me-IBTDB.** Benzaldehyde, and Me<sub>2</sub>BTD-NH<sub>2</sub> (0.087 g, 0.2 mmol) were dissolved in DMSO (5 mL). Then, trifluoroacetic acid (100  $\mu$ L) was added dropwise into the mixture with rapid stirring. Then the mixture was heated to reflux at 110 °C for 12 h under nitrogen atmosphere. After cooling down to room temperature, the mixture was diluted with distilled water (100 mL), the mixture was extracted five times with ethyl acetate, then the organic layers were combined and dried over anhydrous Na<sub>2</sub>SO<sub>4</sub> and the solvent was removed in vacuo. The crude product was purified by silica gel column chromatography to give the target product (yield 81%). <sup>1</sup>H NMR (400 MHz, DMSO-*d*<sub>6</sub>)  $\delta$  12.90 (s, 1H), 8.49 (d, *J* = 8.3 Hz, 2H), 8.39 – 8.22 (m, 2H), 8.19 (t, *J* = 7.9 Hz, 4H), 8.08 (d, *J* = 7.9 Hz, 2H), 7.59 (d, *J* = 7.5 Hz, 3H), 3.94 (s, 6H).<sup>[6]</sup>

**The synthesis of IBTDB.** 2.5 mmol compound Me-IBTDB was added to a solution containing 30 mL CH<sub>3</sub>OH, 30 mL THF and 30 mL water with 1.0 g NaOH. The mixture was heated to reflux at 80 °C overnight. After cooling down to room temperature, the organic solvent was removed under reduced pressure and the resulted aqueous was filtered. Then the filtrate was neutralized using 2M HCl to obtain the precipitate, which was filtered to offer the final product IBTDB (yield 90%). <sup>1</sup>H NMR (400 MHz, DMSO-*d*<sub>6</sub>)  $\delta$  13.07 (s, 2H), 12.88 (s, 1H), 8.45 (d, *J* = 8.1 Hz, 2H), 8.39 (d, *J* = 7.3 Hz, 2H), 8.23 – 8.14 (m, 4H), 8.05 (d, *J* = 7.9 Hz, 2H), 7.59 (d, *J* = 7.1 Hz, 3H).<sup>[6]</sup>

## 4. Synthesis of UiO-66 and UiO-66-L

### 4.1 Synthesis of UiO-66

A mixture of  $ZrCl_4$  (47 mg, 0.2 mmol),  $H_2BDC$  (16 mg, 0.1 mmol) and acetic acid (1.2 g) in 6 mL DMF was sonicated for 5 minutes and then transferred into a Teflon liner at room temperature. The vessel was sealed and placed in an oven at 120 °C for 72 h under static conditions before cooling slowly to room temperature in 12 hours. The precipitates were isolated by centrifugation, washed with DMF three times and followed by washing with methanol two times. After drying under vacuum for 6 h, the obtained product was washed thoroughly with acetone. Finally, the solids were dried at 150 °C under vacuum.

#### 4.2 Synthesis of UiO-66-L

UiO-66-L (50 mg) was added to the solution (3 mmol/L) of the ligand (L = ATDB, BTDB, IBTDB, TBTDB) in DMF (5 mL) and stirred at room temperature for 24 h. The resulting powder product was centrifuged and washed with DMF and methanol thoroughly until the physisorbed ligands removed thoroughly. Finally, the material was dried overnight at 100 °C.

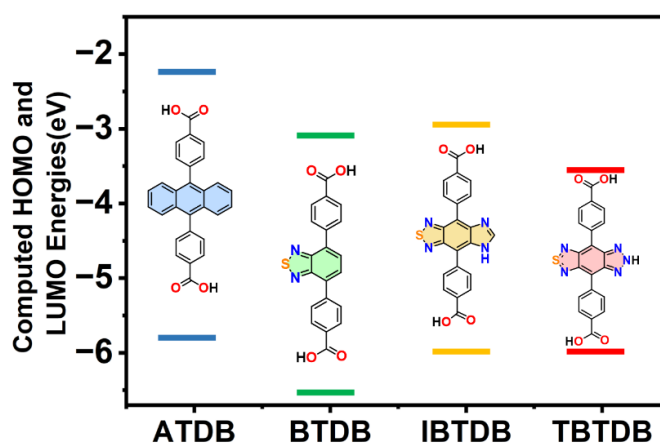

**Figure S1.** Molecular structures and calculated HOMO–LUMO energy levels of ATDB, BTDB, IBTDB, and TBTDB.

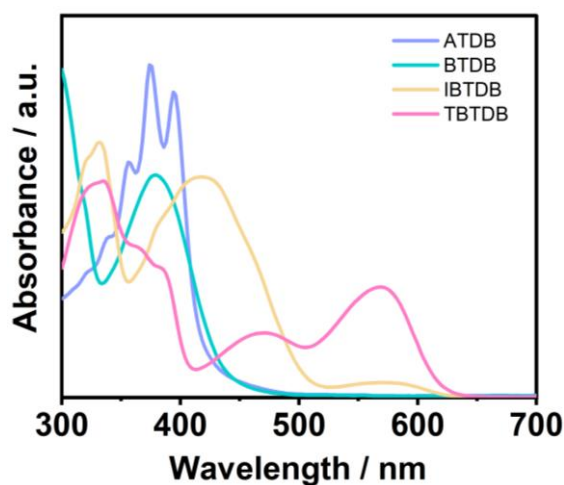

**Figure S2.** UV-vis adsorption spectra of ATDB, BTDB, IBTDB, and TBTDB in DMF solution.

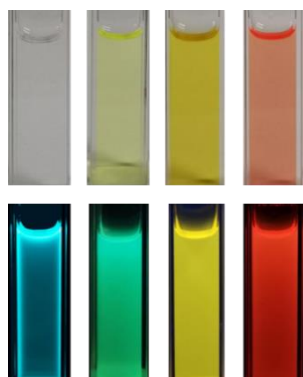

Figure S3. Photographs of the ATDB, BTDB, IBTDB and TBTDB in DMF solution under daylight and 365 nm excitation.

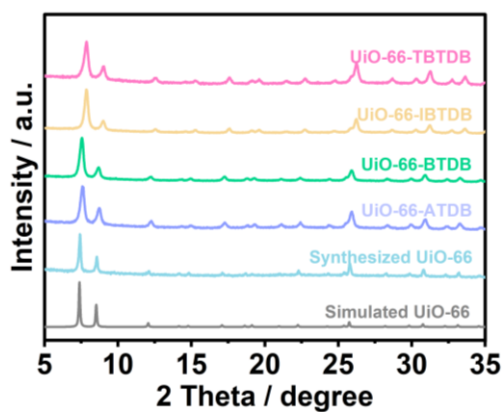

Figure S4. PXRD patterns of the four UiO-66-L MOFs.

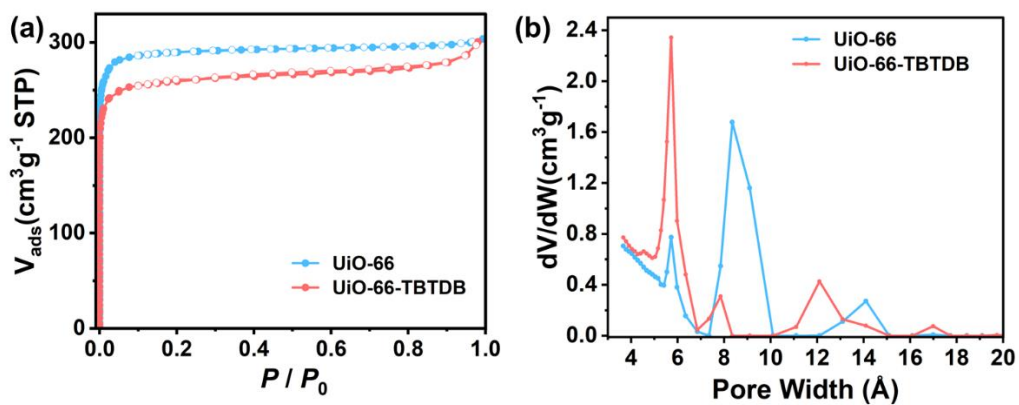

Figure S5.  $N_2$  adsorption-desorption isotherm (a), and pore size distribution (b) for UiO-66 and UiO-66-TBTDB.

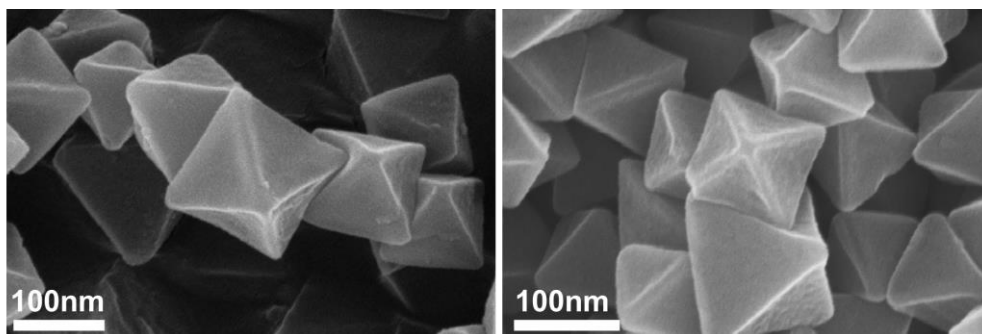

Figure S6. SEM images of UiO-66 (a) and UiO-66-TBTDB (b).

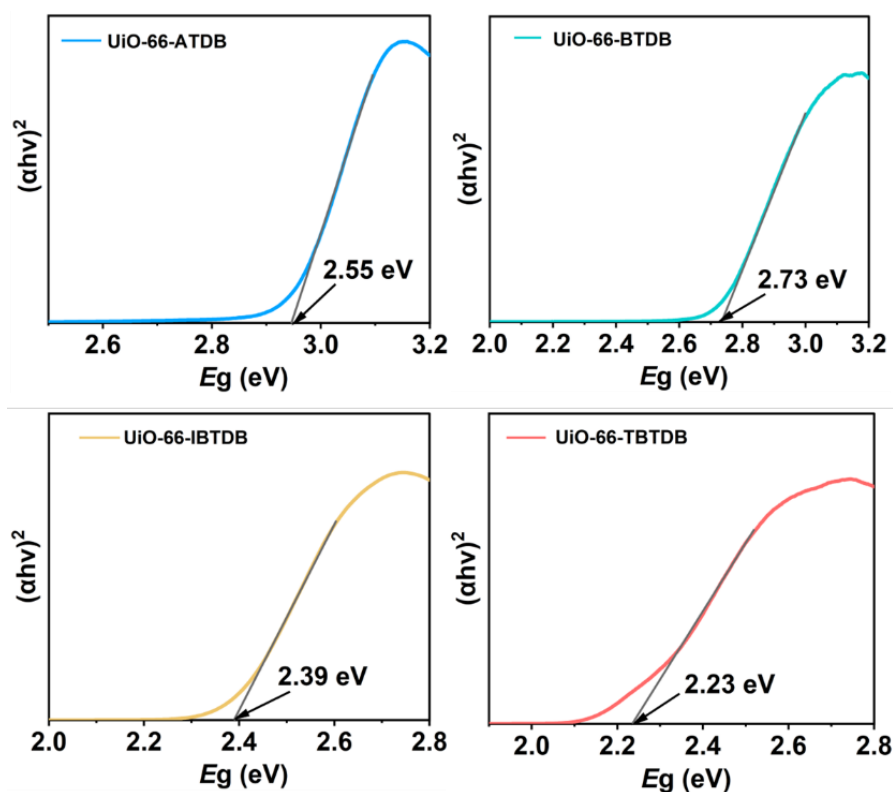

**Figure S7.** The tauc plot for UiO-66-ATDB, UiO-66-BTDB, UiO-66-IBTDB, UiO-66-TBTDB.

## 5. Electrochemical Measurements

MOF powder was ground with poly(vinylidene fluoride) and then ultrasonically dispersed in acetone. The resultant slurry was then drop-casted onto indium tin oxide (ITO) glass with an area of  $0.5 \times 0.5$  cm<sup>2</sup>. A Pt wire (counter electrode), a Ag/AgCl electrode (reference electrode), and a coated ITO conductive glass (working electrode) were assembled into a three-electrode system with 0.5 M Na<sub>2</sub>SO<sub>4</sub> aqueous solution used as the electrolyte. The photocurrent measurements were conducted under the irradiation of a 300 W xenon lamp ( $100 \text{ mW cm}^{-1}$ ) with a 420 nm cut-off filter. The Mott-Schottky plots were collected at 1000 Hz.

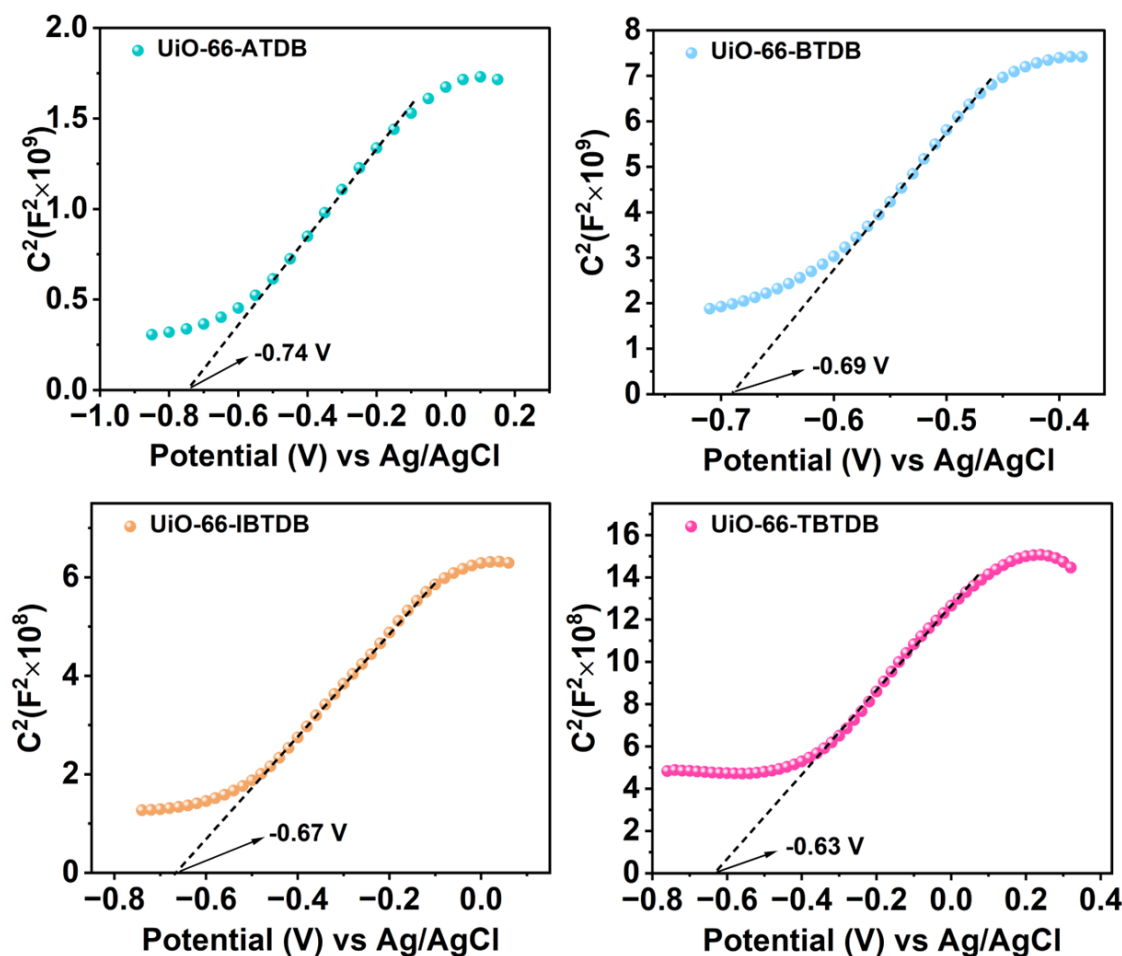

Figure S8. Mott-Schottky plots for UiO-66-ATDB, UiO-66-BTDB, UiO-66-IBTDB, UiO-66-TBTDB

## 6. Catalysis Details

### 6.1 Photocatalytic synthesis of azacycles.

In a typical reaction system, aniline derivatives (0.2 mmol), aldehydes (0.25 mmol), catalyst UiO-66-L (10 mg) and MeOH (3 mL) were added to a flat quartz glass jar with a magnetic stirrer. A 20 W blue LED (450-455 nm) was used as the light source by bottom irradiation. The temperature of the reaction was in the range of  $25 \pm 5$  °C. After 4 h of reaction, the mixture was centrifuged to remove UiO-66-L samples and extracted three times with ethyl acetate, then the organic layers were combined and dried over anhydrous  $\text{Na}_2\text{SO}_4$  and the solvent was removed in vacuo. The crude product was purified by silica gel column chromatography to give the target product.

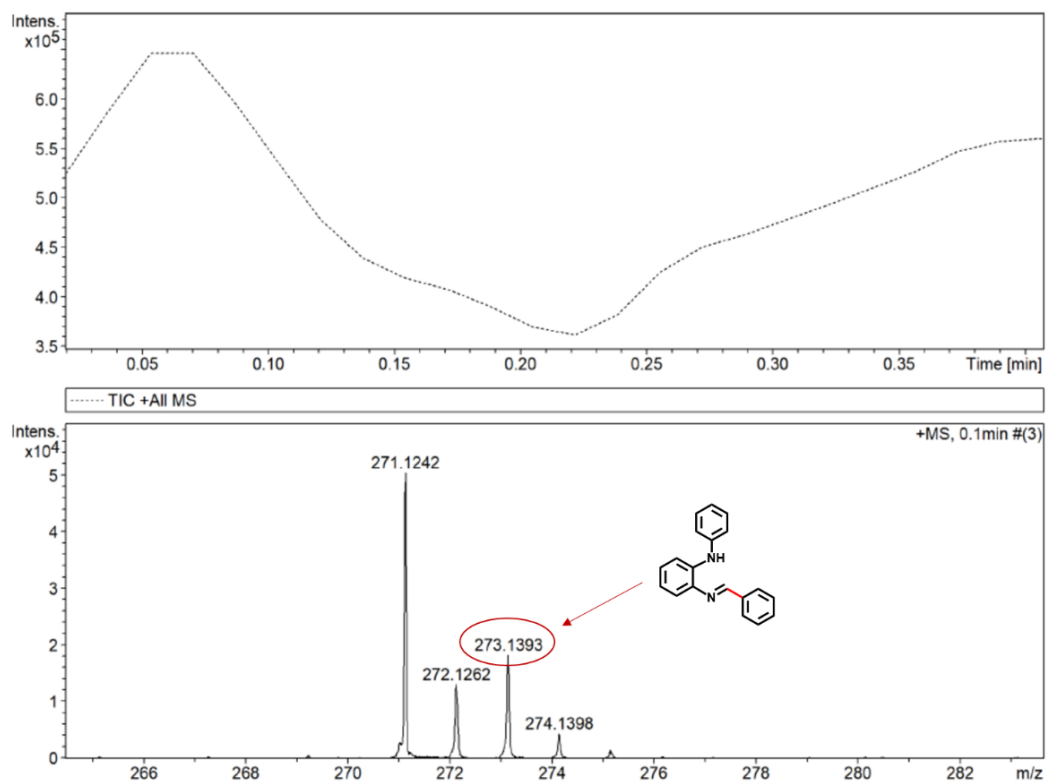

**Figure S9.** HRMS of the intermediate I in the photocatalytic synthesis of 1,2-diphenyl-1H-benzo[d]imidazole (**c1**).

## 6.2. Heterogeneous Catalysis Nature

**Filtration experiment.** In a flat quartz glass jar with a magnetic stirrer, benzaldehyde (0.25 mmol), 2-aminodiphenylamine (0.2 mmol), MeOH (3 mL) and UiO-68-TBTDB (10 mg) were added. The open-air reaction container was placed under a 10 W blue LED lamp and stirred for 4 h. After reacting for 40 min, the catalyst was removed through gravity filtration. The yields were then monitored at different periods.

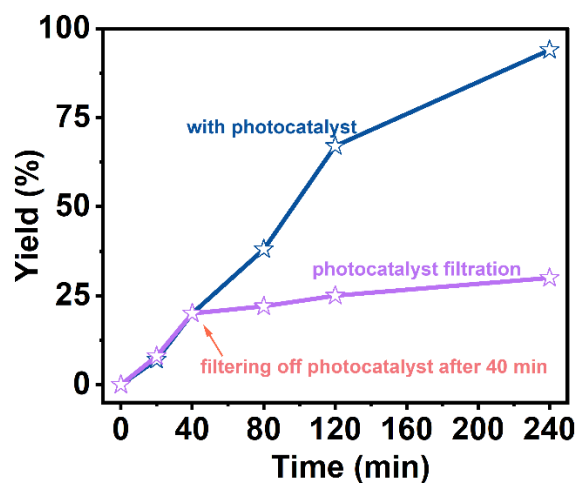

**Figure S10.** Leaching test experiment of UiO-66-TBTDB.

**Recycling experiments.** The recycling experiments were carried out with 2-aminodiphenylamine and benzaldehyde under the optimized reaction condition. After the reaction, UiO-68-TBTDB was separated via filtration, then washed thoroughly with ethyl acetate. The recycled UiO-68-TBTDB was dried and then subject to the next cycle.

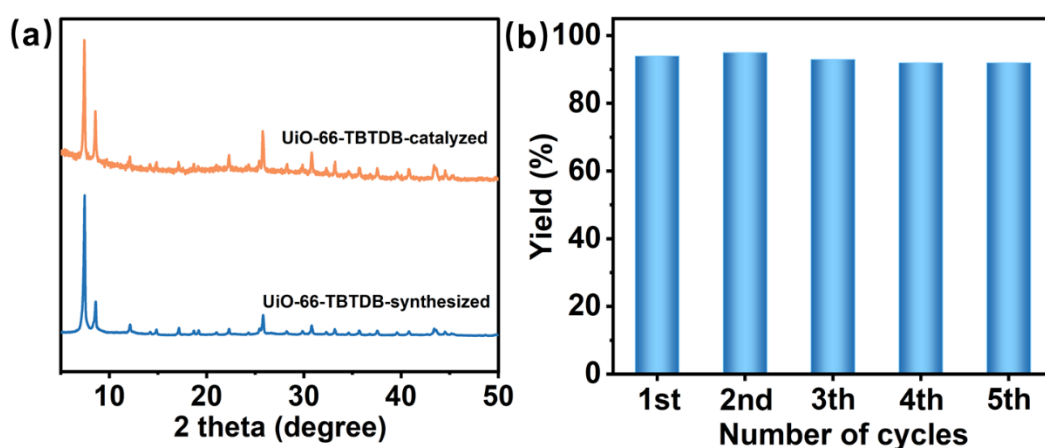

**Figure S11.** (a) PXRD patterns of the as-synthesized UiO-68-TBTDB and catalysts after 5 cycles.

(b) Recycling of UiO-68-TBTDB for photocatalytic synthesis of **c1**.

**Table S1.** Quenching experiments of reaction conditions <sup>a</sup>

| Entry | Deviation from standard condition                             | Yield <sup>b</sup> (%) |
|-------|---------------------------------------------------------------|------------------------|
| 1     | no variation                                                  | 94                     |
| 2     | TEMPO                                                         | 18                     |
| 3     | IPA                                                           | 90                     |
| 4     | NaN <sub>3</sub>                                              | 26                     |
| 5     | BQ                                                            | 22                     |
| 6     | AgNO <sub>3</sub>                                             | 25                     |
| 7     | C <sub>2</sub> O <sub>4</sub> (NH <sub>4</sub> ) <sub>2</sub> | 32                     |

<sup>a</sup> Standard conditions: **a1** (0.2 mmol), **b2** (0.25 mmol), catalyst (10 mg), MeOH (3 mL), 10 W blue LED lamps, room temperature, air, 4 h. <sup>b</sup> Isolated yields.

## 7. <sup>1</sup>H NMR and <sup>13</sup>C NMR of products

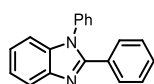

**1,2-diphenyl-1*H*-benzo[*d*]imidazole (c1)**; 94% yield; white solid; <sup>1</sup>H NMR (400 MHz, Chloroform-*d*) δ 7.89 (d, *J* = 8.3 Hz, 1H), 7.59 – 7.54 (m, 2H), 7.48 (td, *J* = 8.4, 5.4 Hz, 3H), 7.35 – 7.29 (m, 6H), 7.26 – 7.24 (m, 2H). <sup>13</sup>C NMR (100 MHz, Chloroform-*d*) δ 152.5, 143.1, 137.3, 137.1, 130.0, 130.0, 129.6 (2C), 128.6, 128.4, 127.5, 123.4, 123.1, 119.9, 110.6. HRMS Calcd (ESI) *m/z* for C<sub>19</sub>H<sub>15</sub>N<sub>2</sub>: [M+H]<sup>+</sup> 271.1230, Found: 271.1236.

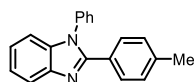

**1-phenyl-2-(*p*-tolyl)-1*H*-benzo[*d*]imidazole (c2)**; 97% yield; white solid; <sup>1</sup>H NMR (400 MHz, Chloroform-*d*) δ 7.88 (d, *J* = 7.9 Hz, 1H), 7.48 (dt, *J* = 11.4, 6.9 Hz, 5H), 7.31 (td, *J* = 8.0, 7.0, 4.5 Hz, 3H), 7.24 (dd, *J* = 6.7, 2.5 Hz, 2H), 7.10 (d, *J* = 7.9 Hz, 2H), 2.32 (s, 3H). <sup>13</sup>C NMR (100 MHz, Chloroform-*d*) δ 152.6, 143.0, 139.7, 137.3, 137.2, 130.0, 129.4, 129.2, 128.6, 127.5, 127.1, 123.3, 123.0, 119.8, 110.5, 21.5. HRMS Calcd (ESI) *m/z* for C<sub>20</sub>H<sub>17</sub>N<sub>2</sub>: [M+H]<sup>+</sup> 285.1386, Found: 285.1375.

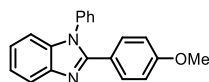

**2-(4-methoxyphenyl)-1-phenyl-1*H*-benzo[*d*]imidazole (c3)**; 96% yield; white solid; <sup>1</sup>H NMR (400 MHz, Chloroform-*d*) δ 7.87 (d, *J* = 8.1 Hz, 1H), 7.58 – 7.40 (m, 5H), 7.32 (ddd, *J* = 7.9, 6.1, 1.9 Hz, 3H), 7.26 – 7.18 (m, 2H), 6.97 – 6.62 (m, 2H), 3.78 (s, 3H). <sup>13</sup>C NMR (100 MHz, Chloroform-*d*) δ 160.6, 152.4, 143.0, 137.3, 137.2, 131.0, 130.0, 128.6, 127.6, 123.1, 123.0, 122.3, 119.6, 113.9, 110.4, 55.4. HRMS Calcd (ESI) *m/z* for C<sub>20</sub>H<sub>17</sub>N<sub>2</sub>O: [M+H]<sup>+</sup> 301.1335, Found: 301.1342.

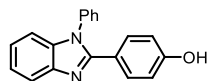

**4-(1-phenyl-1*H*-benzo[*d*]imidazol-2-yl)phenol (c4)**; 92% yield; white solid; <sup>1</sup>H NMR (400 MHz, DMSO-*d*<sub>6</sub>) δ 9.92 (s, 1H), 7.74 (d, *J* = 7.8 Hz, 1H), 7.62 – 7.52 (m, 3H), 7.41 (dd, *J* = 7.0, 1.9 Hz, 2H), 7.37 – 7.33 (m, 2H), 7.28 (t, *J* = 7.2 Hz, 1H), 7.22 (t, *J* = 7.5 Hz, 1H), 7.14 (d, *J* = 7.9 Hz, 1H), 6.73 (d, *J* = 8.7 Hz, 2H). <sup>13</sup>C NMR (100 MHz, DMSO-*d*<sub>6</sub>) δ 159.2, 152.8, 143.1, 137.6, 137.3, 131.2, 130.6, 129.2, 128.1, 123.3, 123.0, 120.9, 119.5, 115.7, 110.7. HRMS Calcd (ESI) *m/z* for C<sub>19</sub>H<sub>15</sub>N<sub>2</sub>O: [M+H]<sup>+</sup> 287.1179, Found: 287.1170.

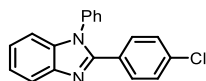

**2-(4-chlorophenyl)-1-phenyl-1H-benzo[d]imidazole (c5)**; 93% yield; white solid;  $^1\text{H}$  NMR (400 MHz, Chloroform-*d*)  $\delta$  7.87 (d,  $J = 8.0$  Hz, 1H), 7.50 (d,  $J = 7.4$  Hz, 4H), 7.36 – 7.23 (m, 8H).  $^{13}\text{C}$  NMR (100 MHz, Chloroform-*d*)  $\delta$  151.3, 142.9, 137.3, 136.8, 135.8, 130.8, 130.1, 128.9, 128.7, 128.5, 127.5, 123.7, 123.3, 120.0, 110.6. HRMS Calcd (ESI)  $m/z$  for  $\text{C}_{19}\text{H}_{14}\text{ClN}_2$ :  $[\text{M}+\text{H}]^+$  305.0840, Found: 305.0833.

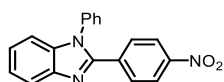

**2-(4-nitrophenyl)-1-phenyl-1H-benzo[d]imidazole (c6)**; 91% yield; white solid;  $^1\text{H}$  NMR (400 MHz, Chloroform-*d*)  $\delta$  8.18 – 8.12 (m, 2H), 7.92 (d,  $J = 7.7$  Hz, 1H), 7.79 – 7.74 (m, 2H), 7.60 – 7.53 (m, 3H), 7.42 – 7.36 (m, 1H), 7.36 – 7.31 (m, 3H), 7.27 (dd,  $J = 7.9, 1.5$  Hz, 1H).  $^{13}\text{C}$  NMR (100 MHz, Chloroform-*d*)  $\delta$  149.7, 148.1, 142.9, 137.5, 136.4, 136.1, 130.4, 130.2, 129.4, 127.4, 124.6, 123.8, 123.6, 120.4, 110.9. HRMS Calcd (ESI)  $m/z$  for  $\text{C}_{19}\text{H}_{14}\text{N}_3\text{O}_2$ :  $[\text{M}+\text{H}]^+$  316.1081, Found: 316.1088.

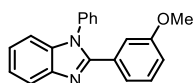

**2-(3-methoxyphenyl)-1-phenyl-1H-benzo[d]imidazole (c7)**; 93% yield; white solid;  $^1\text{H}$  NMR (400 MHz, Chloroform-*d*)  $\delta$  7.89 (d,  $J = 8.4$  Hz, 1H), 7.51 – 7.45 (m, 3H), 7.34 – 7.30 (m, 3H), 7.25 (dd,  $J = 6.5, 1.3$  Hz, 2H), 7.20 – 7.14 (m, 2H), 7.12 – 7.08 (m, 1H), 6.91 – 6.87 (m, 1H), 3.68 (s, 3H).  $^{13}\text{C}$  NMR (100 MHz, Chloroform-*d*)  $\delta$  159.4, 152.3, 142.9, 137.3, 137.1, 131.1, 130.0, 129.4, 128.7, 127.5, 123.5, 123.2, 122.0, 119.9, 116.4, 114.1, 110.6, 55.3. HRMS Calcd (ESI)  $m/z$  for  $\text{C}_{20}\text{H}_{17}\text{N}_2\text{O}$ :  $[\text{M}+\text{H}]^+$  301.1335, Found: 301.1329.

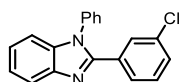

**2-(3-chlorophenyl)-1-phenyl-1H-benzo[d]imidazole (c8)**; 88% yield; white solid;  $^1\text{H}$  NMR (400 MHz, Chloroform-*d*)  $\delta$  7.89 (d,  $J = 7.9$  Hz, 1H), 7.67 (t,  $J = 2.0$  Hz, 1H), 7.55 – 7.48 (m, 3H), 7.37 – 7.34 (m, 1H), 7.33 – 7.29 (m, 4H), 7.28 – 7.23 (m, 2H), 7.19 (t,  $J = 7.8$  Hz, 1H).  $^{13}\text{C}$  NMR (100 MHz, Chloroform-*d*)  $\delta$  150.9, 142.8, 137.3, 136.7, 134.5, 131.7, 130.1, 129.7, 129.62, 129.60, 129.0, 127.5, 127.4, 123.9, 123.4,

120.1, 110.7. HRMS Calcd (ESI)  $m/z$  for  $C_{19}H_{14}ClN_2$ :  $[M+H]^+$  305.0840, Found: 305.0847.

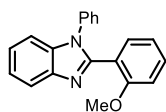

**2-(2-methoxyphenyl)-1-phenyl-1H-benzo[d]imidazole (c9)**; 84% yield; white solid;  $^1H$  NMR (400 MHz, Chloroform-*d*)  $\delta$  7.90 (d,  $J = 7.8$  Hz, 1H), 7.68 – 7.64 (m, 1H), 7.42 – 7.34 (m, 5H), 7.30 (dd,  $J = 15.5, 7.5$  Hz, 2H), 7.24 (t,  $J = 7.1$  Hz, 2H), 7.03 (t,  $J = 7.5$  Hz, 1H), 6.72 (d,  $J = 8.4$  Hz, 1H), 3.30 (s, 3H).  $^{13}C$  NMR (100 MHz, Chloroform-*d*)  $\delta$  157.0, 151.4, 143.2, 137.3, 136.1, 132.3, 131.6, 129.1, 127.7, 126.0, 123.2, 122.7, 120.8, 120.0, 119.9, 110.9, 110.4, 54.8. HRMS Calcd (ESI)  $m/z$  for  $C_{20}H_{17}N_2O$ :  $[M+H]^+$  301.1335, Found: 301.1344.

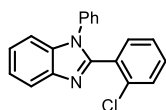

**2-(2-chlorophenyl)-1-phenyl-1H-benzo[d]imidazole (c10)**; 86% yield; white solid;  $^1H$  NMR (400 MHz, Chloroform-*d*)  $\delta$  7.93 (d,  $J = 7.8$  Hz, 1H), 7.51 (d,  $J = 7.2$  Hz, 1H), 7.41 – 7.35 (m, 5H), 7.35 – 7.31 (m, 3H), 7.31 – 7.27 (m, 1H), 7.27 – 7.24 (m, 2H).  $^{13}C$  NMR (100 MHz, Chloroform-*d*)  $\delta$  150.6, 143.0, 136.1, 135.9, 134.2, 132.6, 131.1, 130.3, 129.8, 129.5, 128.3, 126.72, 126.68, 123.8, 123.1, 120.4, 110.7. HRMS Calcd (ESI)  $m/z$  for  $C_{19}H_{14}ClN_2$ :  $[M+H]^+$  305.0840, Found: 305.0839.

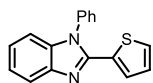

**1-phenyl-2-(thiophen-2-yl)-1H-benzo[d]imidazole (c11)**; 89% yield; white solid;  $^1H$  NMR (400 MHz, Chloroform-*d*)  $\delta$  7.85 (d,  $J = 8.0$  Hz, 1H), 7.65 – 7.55 (m, 3H), 7.41 (dd,  $J = 6.5, 3.2$  Hz, 2H), 7.36 – 7.28 (m, 2H), 7.21 (t,  $J = 7.6$  Hz, 1H), 7.06 (d,  $J = 8.0$  Hz, 1H), 6.92 – 6.87 (m, 1H), 6.84 (d,  $J = 3.9$  Hz, 1H).  $^{13}C$  NMR (100 MHz, Chloroform-*d*)  $\delta$  147.5, 142.8, 137.8, 136.5, 132.7, 130.3, 129.8, 128.5, 128.4, 128.3, 127.7, 123.5, 123.2, 119.6, 110.3. HRMS Calcd (ESI)  $m/z$  for  $C_{17}H_{13}N_2S$ :  $[M+H]^+$  277.0794, Found: 277.0789.

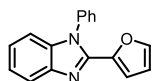

**2-(furan-2-yl)-1-phenyl-1H-benzo[d]imidazole (c12)**; 90% yield; white solid;  $^1\text{H}$  NMR (400 MHz, Chloroform-*d*)  $\delta$  7.86 (d,  $J = 7.9$  Hz, 1H), 7.61 – 7.54 (m, 3H), 7.49 – 7.36 (m, 3H), 7.30 (t,  $J = 7.6$  Hz, 1H), 7.22 (t,  $J = 7.6$  Hz, 1H), 7.07 (d,  $J = 8.0$  Hz, 1H), 6.37 – 6.31 (m, 1H), 6.14 (d,  $J = 3.7$  Hz, 1H).  $^{13}\text{C}$  NMR (100 MHz, Chloroform-*d*)  $\delta$  144.5, 144.3, 142.9, 137.2, 136.4, 130.09, 130.08, 129.6, 128.1, 123.7, 123.2, 120.0, 112.3, 111.6, 110.3. HRMS Calcd (ESI)  $m/z$  for  $\text{C}_{17}\text{H}_{13}\text{N}_2\text{O}$ :  $[\text{M}+\text{H}]^+$  261.1022, Found: 261.1031.

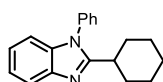

**2-cyclohexyl-1-phenyl-1H-benzo[d]imidazole (c13)**; 83% yield; white solid;  $^1\text{H}$  NMR (400 MHz, Chloroform-*d*)  $\delta$  7.80 (d,  $J = 7.8$  Hz, 1H), 7.61 – 7.52 (m, 3H), 7.34 (dd,  $J = 7.0, 1.9$  Hz, 2H), 7.25 (t,  $J = 7.6$  Hz, 1H), 7.19 – 7.14 (m, 1H), 7.05 (d,  $J = 8.0$  Hz, 1H), 2.75 – 2.64 (m, 1H), 1.92 – 1.76 (m, 6H), 1.70 – 1.62 (m, 1H), 1.34 – 1.15 (m, 3H).  $^{13}\text{C}$  NMR (100 MHz, Chloroform-*d*)  $\delta$  159.4, 142.5, 136.5, 136.1, 130.0, 129.0, 127.7, 122.6, 122.4, 119.2, 110.1, 36.3, 32.1, 26.2, 25.8. HRMS Calcd (ESI)  $m/z$  for  $\text{C}_{19}\text{H}_{21}\text{N}_2$ :  $[\text{M}+\text{H}]^+$  277.1699, Found: 277.1692.

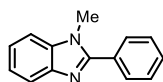

**1-methyl-2-phenyl-1H-benzo[d]imidazole (c14)**; 97% yield; white solid;  $^1\text{H}$  NMR (400 MHz, Chloroform-*d*)  $\delta$  7.86 – 7.80 (m, 1H), 7.75 (dd,  $J = 6.1, 2.1$  Hz, 2H), 7.54 – 7.47 (m, 3H), 7.38 – 7.35 (m, 1H), 7.33 – 7.28 (m, 2H), 3.82 (s, 3H).  $^{13}\text{C}$  NMR (100 MHz, Chloroform-*d*)  $\delta$  153.9, 143.0, 136.7, 130.3, 129.8, 129.5, 128.8, 122.9, 122.5, 119.9, 109.8, 31.8. HRMS Calcd (ESI)  $m/z$  for  $\text{C}_{14}\text{H}_{13}\text{N}_2$ :  $[\text{M}+\text{H}]^+$  209.1073, Found: 209.1076.

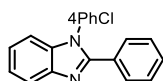

**1-(4-chlorophenyl)-2-phenyl-1H-benzo[d]imidazole (c15)**; 92% yield; white solid;  $^1\text{H}$  NMR (400 MHz, Chloroform-*d*)  $\delta$  7.89 (d,  $J = 7.9$  Hz, 1H), 7.55 (d,  $J = 7.1$  Hz, 2H), 7.47 (d,  $J = 8.3$  Hz, 2H), 7.39 – 7.29 (m, 5H), 7.24 (d,  $J = 8.6$  Hz, 3H).  $^{13}\text{C}$  NMR (100

MHz, Chloroform-*d*)  $\delta$  152.4, 143.1, 137.0, 135.6, 134.5, 130.3, 129.8, 129.7, 129.6, 128.7, 128.6, 123.7, 123.3, 120.1, 110.3. HRMS Calcd (ESI) *m/z* for C<sub>19</sub>H<sub>14</sub>ClN<sub>2</sub>: [M+H]<sup>+</sup> 305.0840, Found: 305.0833.

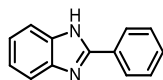

**2-phenyl-1H-benzo[d]imidazole (c16)**; 95% yield; white solid; <sup>1</sup>H NMR (400 MHz, DMSO-*d*<sub>6</sub>)  $\delta$  12.92 (s, 1H), 8.18 (d, *J* = 8.1 Hz, 2H), 7.66 (d, *J* = 7.6 Hz, 1H), 7.52 (t, *J* = 7.4 Hz, 3H), 7.45 (t, *J* = 7.3 Hz, 1H), 7.18 (q, *J* = 4.8 Hz, 2H). <sup>13</sup>C NMR (100 MHz, DMSO-*d*<sub>6</sub>)  $\delta$  151.8, 144.4, 135.6, 130.7, 130.4, 129.5, 127.0, 123.1, 122.2, 119.4, 111.9. HRMS Calcd (ESI) *m/z* for C<sub>13</sub>H<sub>11</sub>N<sub>2</sub>: [M+H]<sup>+</sup> 195.0917, Found: 195.0909.

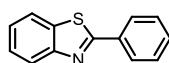

**2-phenylbenzo[d]thiazole (c17)**; 97% yield; white solid; <sup>1</sup>H NMR (400 MHz, Chloroform-*d*)  $\delta$  8.11 – 8.06 (m, 3H), 7.89 (d, *J* = 8.4 Hz, 1H), 7.52 – 7.46 (m, 4H), 7.40 – 7.35 (m, 1H). <sup>13</sup>C NMR (100 MHz, Chloroform-*d*)  $\delta$  168.2, 154.2, 135.1, 133.7, 131.1, 129.1, 127.7, 126.5, 125.3, 123.3, 121.7. HRMS Calcd (ESI) *m/z* for C<sub>13</sub>H<sub>10</sub>NS: [M+H]<sup>+</sup> 212.0528, Found: 212.0531.

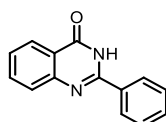

**2-phenylquinazolin-4(3H)-one (c18)**; 92% yield; white solid; <sup>1</sup>H NMR (400 MHz, DMSO-*d*<sub>6</sub>)  $\delta$  8.14 (dd, *J* = 9.8, 7.8 Hz, 3H), 7.81 (t, *J* = 7.8 Hz, 1H), 7.71 (d, *J* = 8.0 Hz, 1H), 7.58 – 7.46 (m, 4H). HRMS Calcd (ESI) *m/z* for C<sub>14</sub>H<sub>11</sub>N<sub>2</sub>O: [M+H]<sup>+</sup> 223.0866, Found: 223.0872.

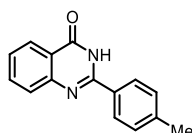

**2-(*p*-tolyl)quinazolin-4(3H)-one (c19)**; 95% yield; white solid; <sup>1</sup>H NMR (400 MHz, DMSO-*d*<sub>6</sub>)  $\delta$  12.46 (s, 1H), 8.16 – 8.03 (m, 3H), 7.83 – 7.75 (m, 1H), 7.69 (d, *J* = 8.0

Hz, 1H), 7.47 (t,  $J = 7.4$  Hz, 1H), 7.32 (d,  $J = 8.1$  Hz, 2H), 2.36 (s, 3H). HRMS Calcd (ESI)  $m/z$  for  $C_{15}H_{13}N_2O$ :  $[M+H]^+$  237.1022, Found: 237.1017.

## 8. NMR spectra

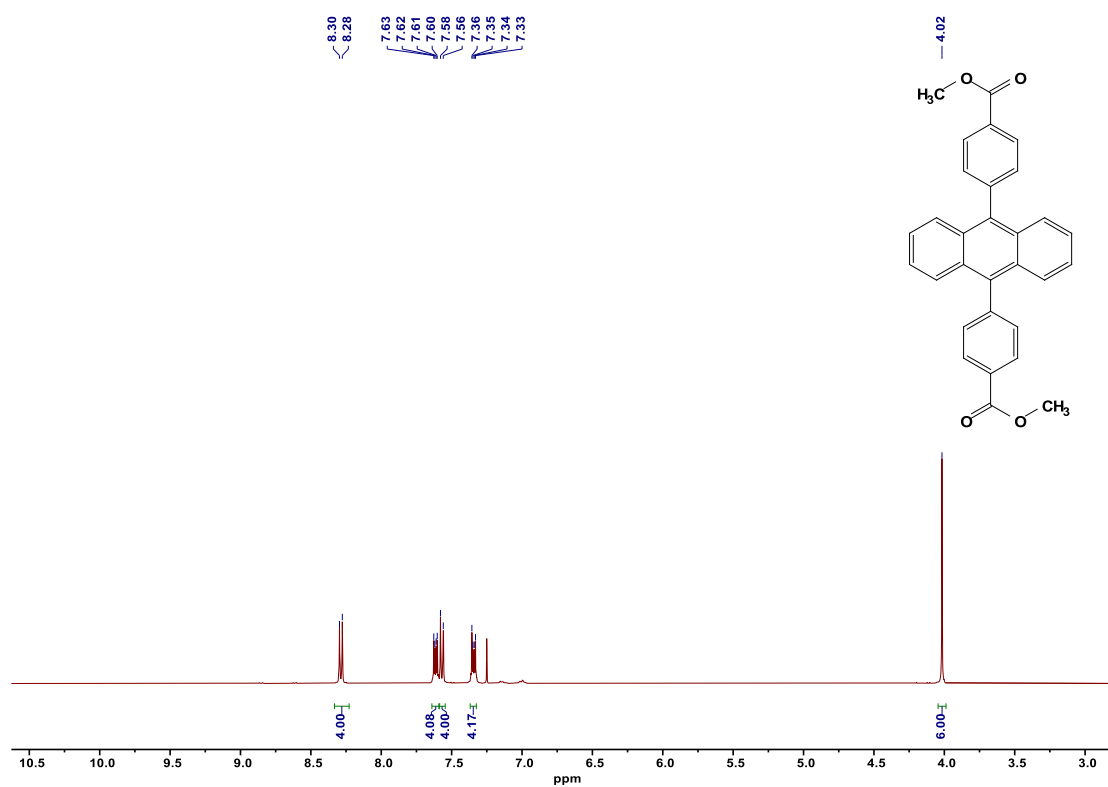

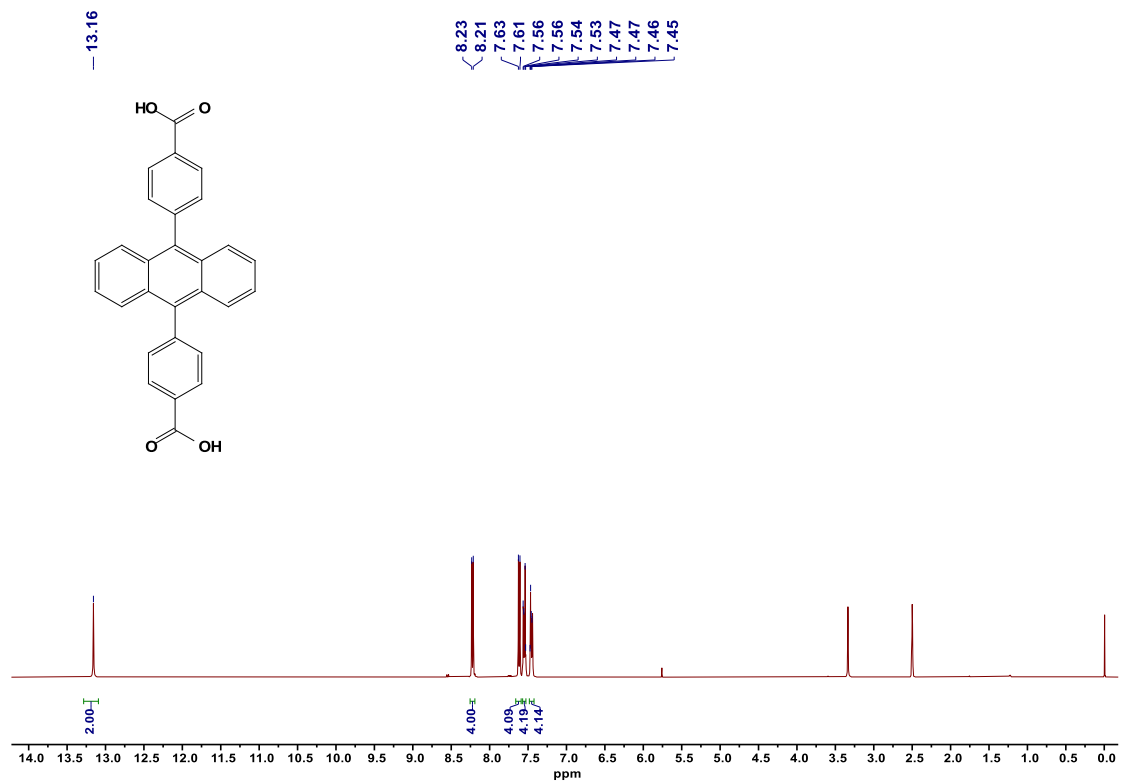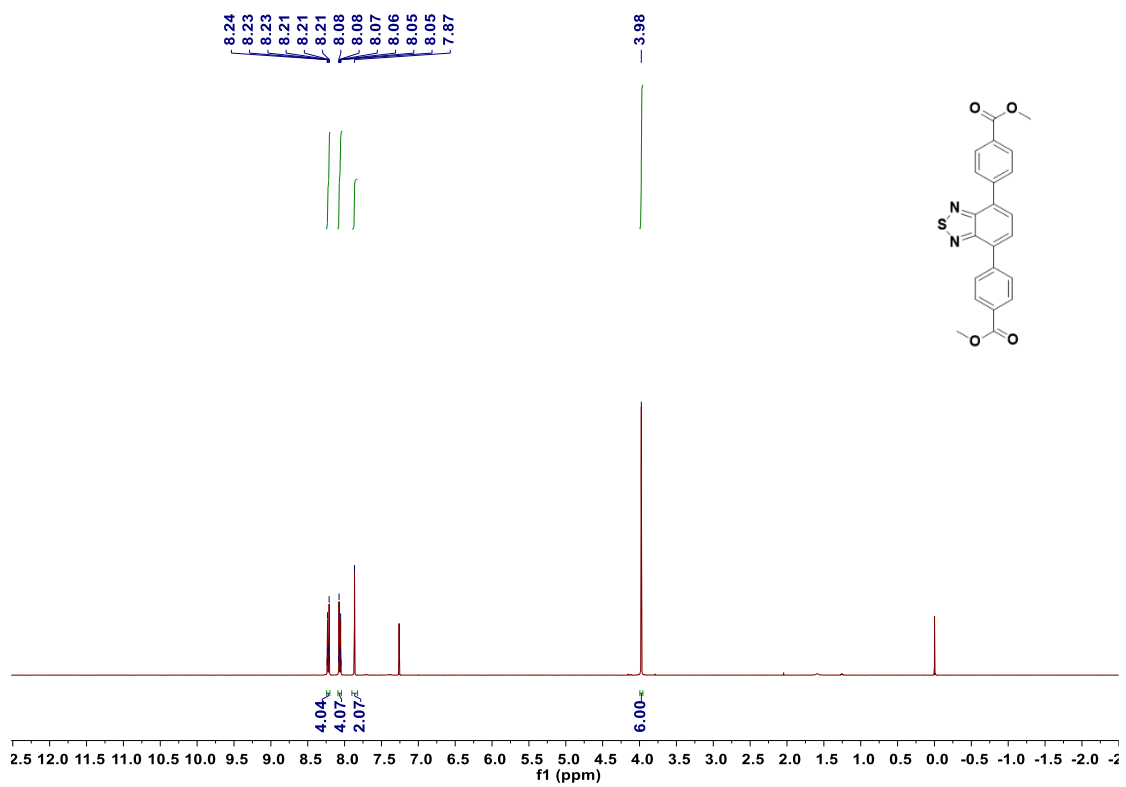

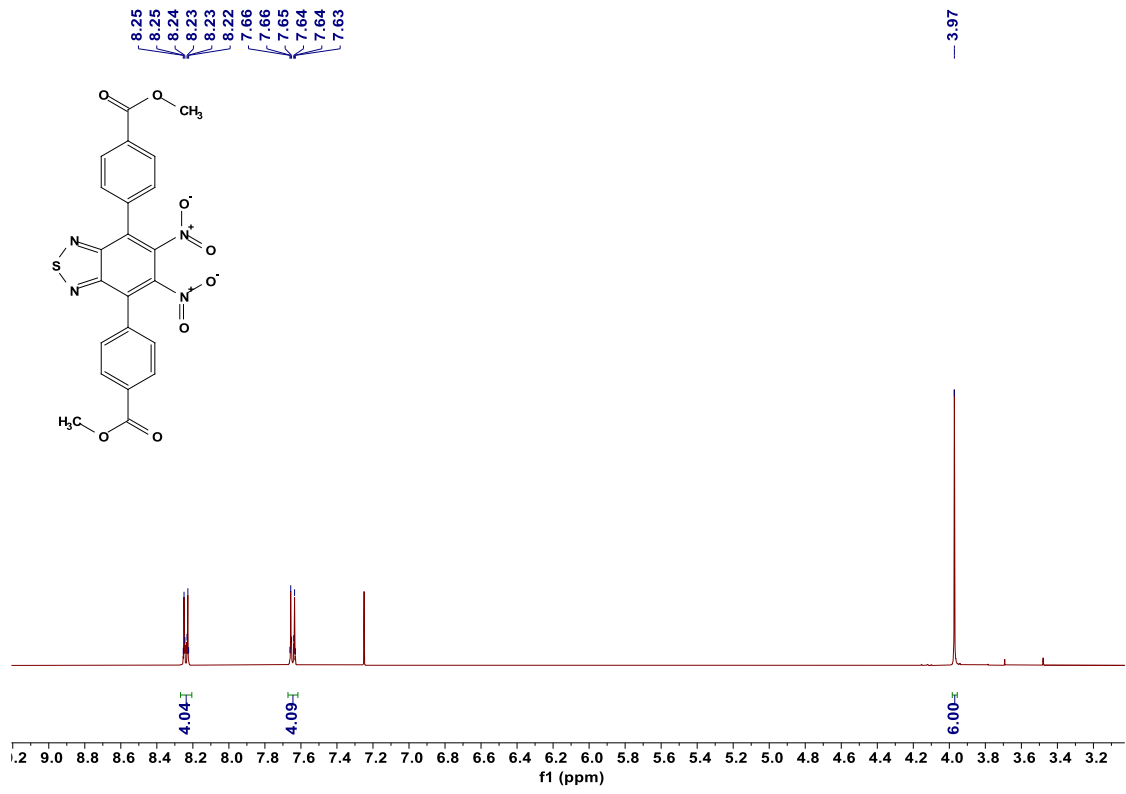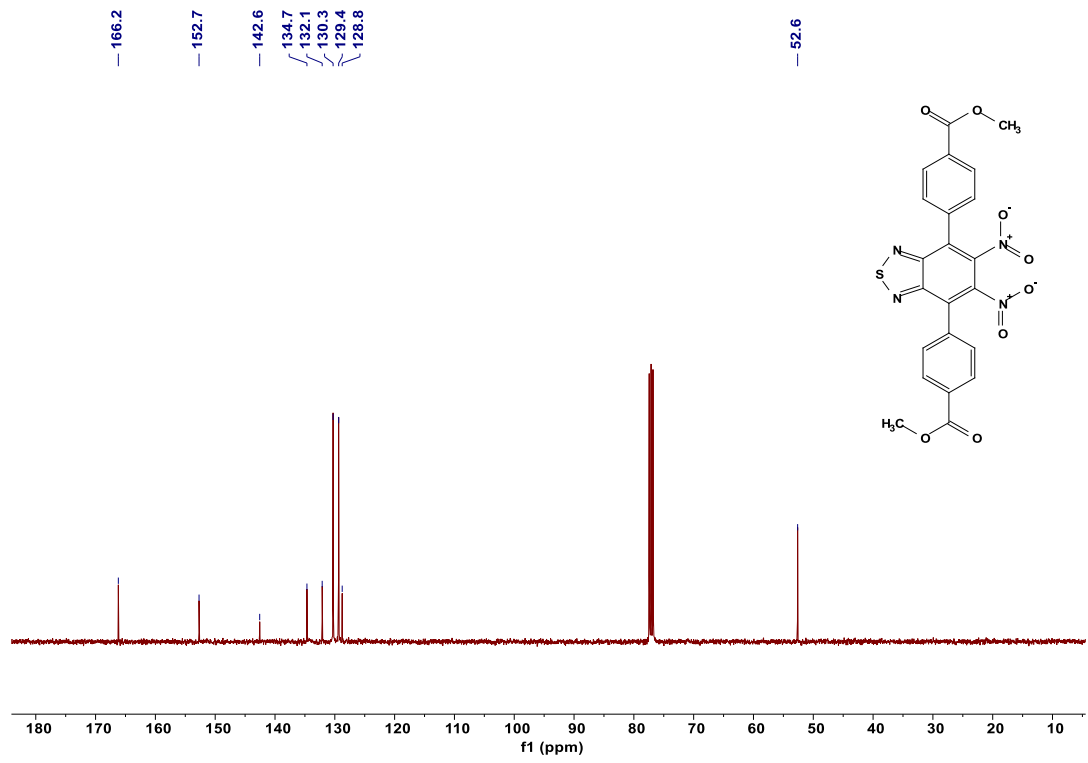

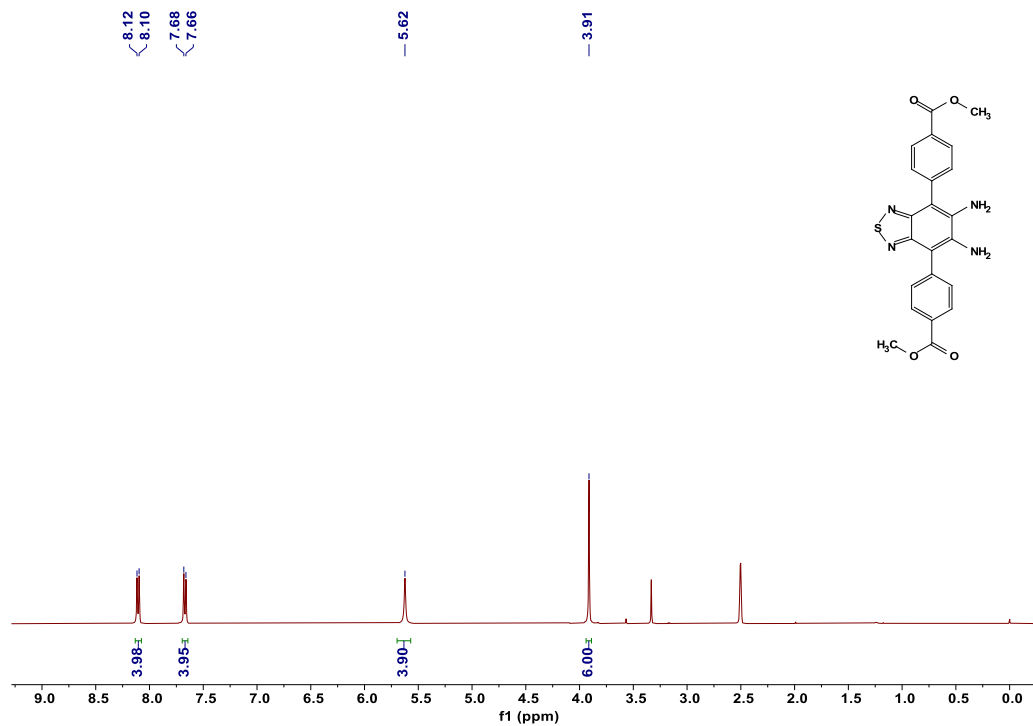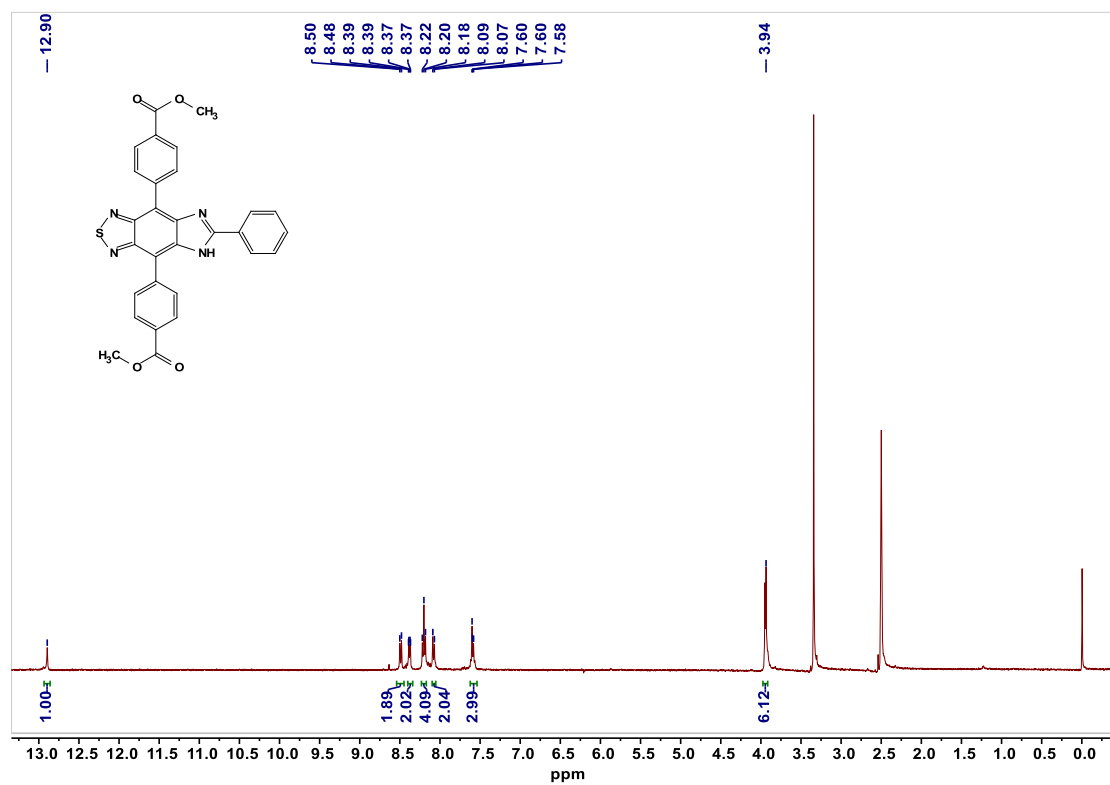

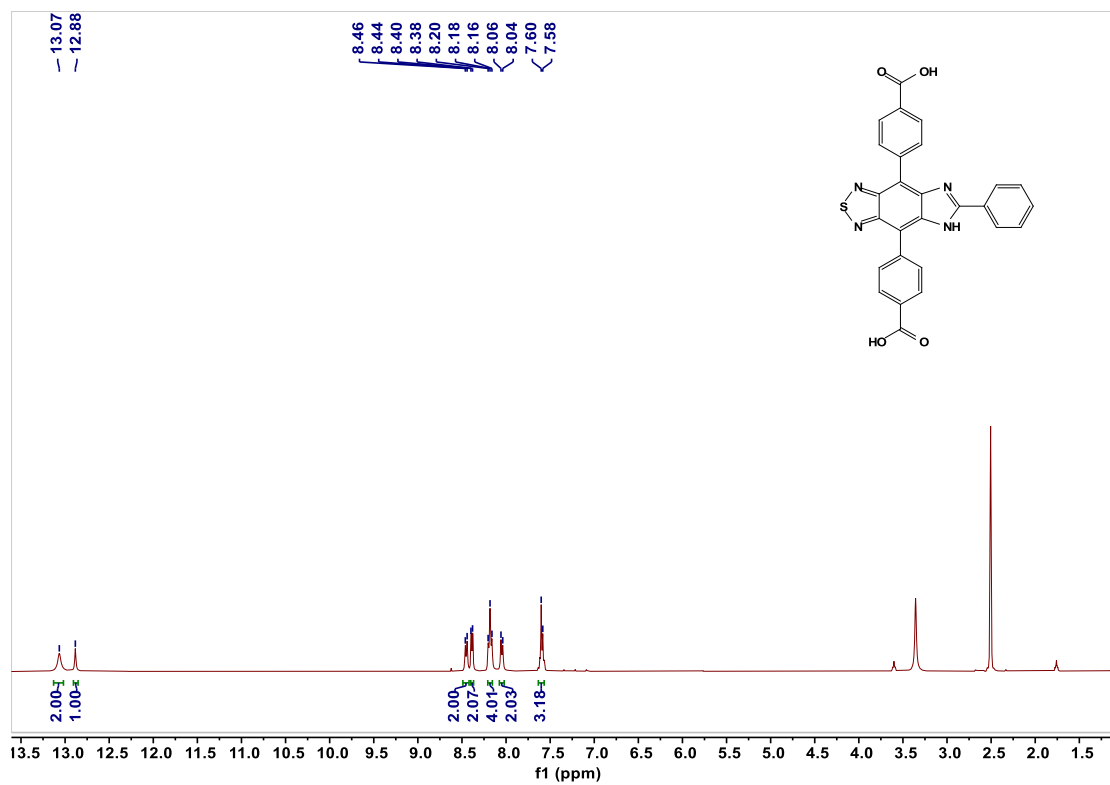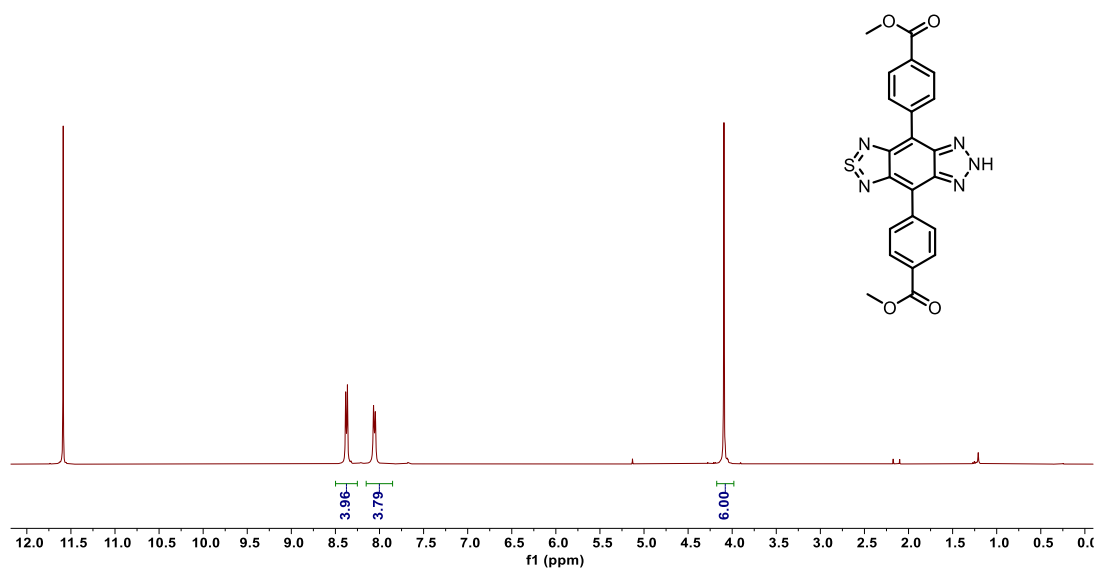

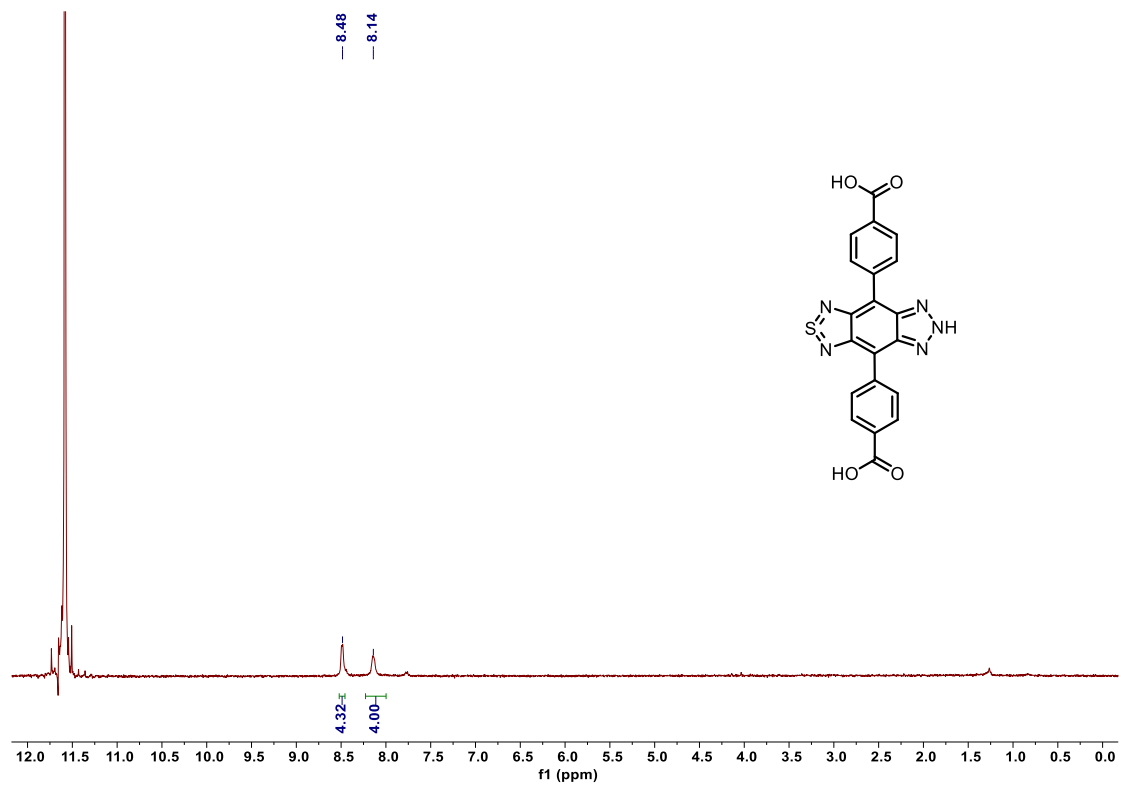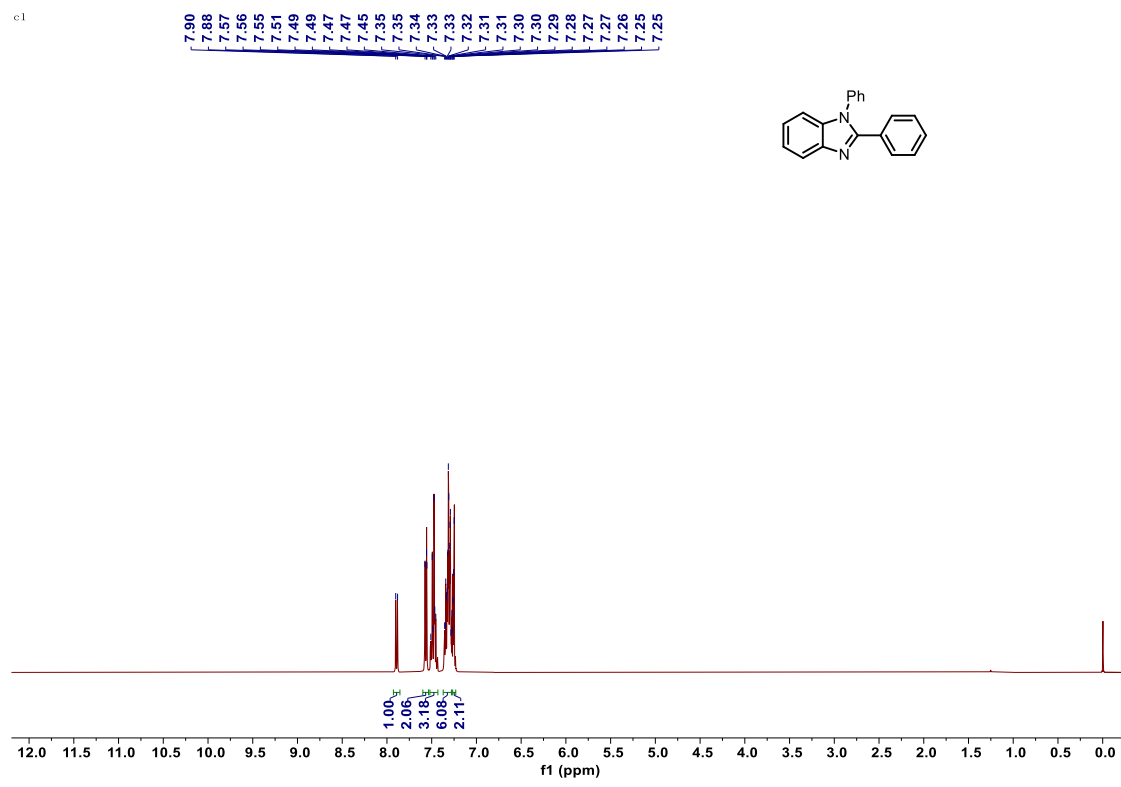

c1

152.5  
143.1  
137.3  
137.1  
130.0  
129.6  
128.4  
127.5  
123.4  
123.1  
119.9  
110.6

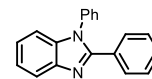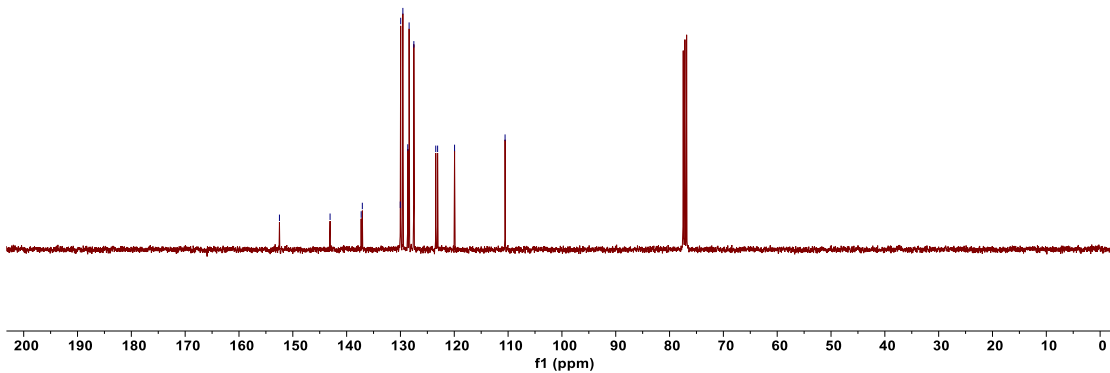

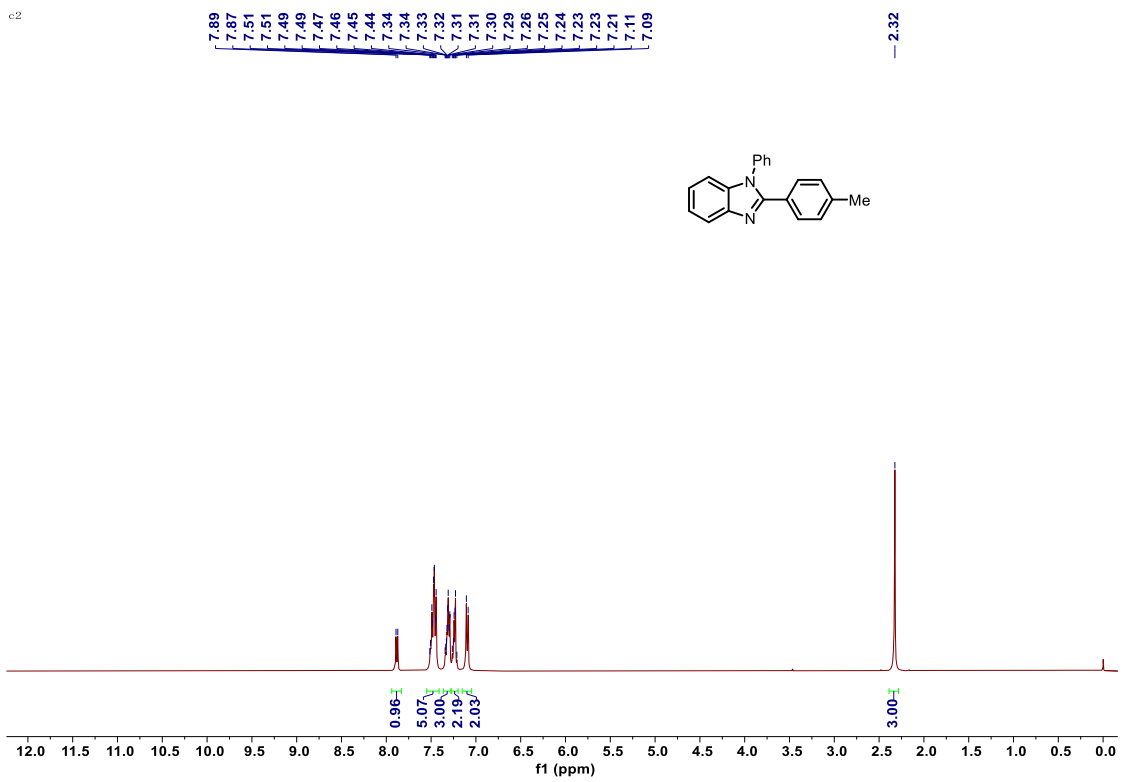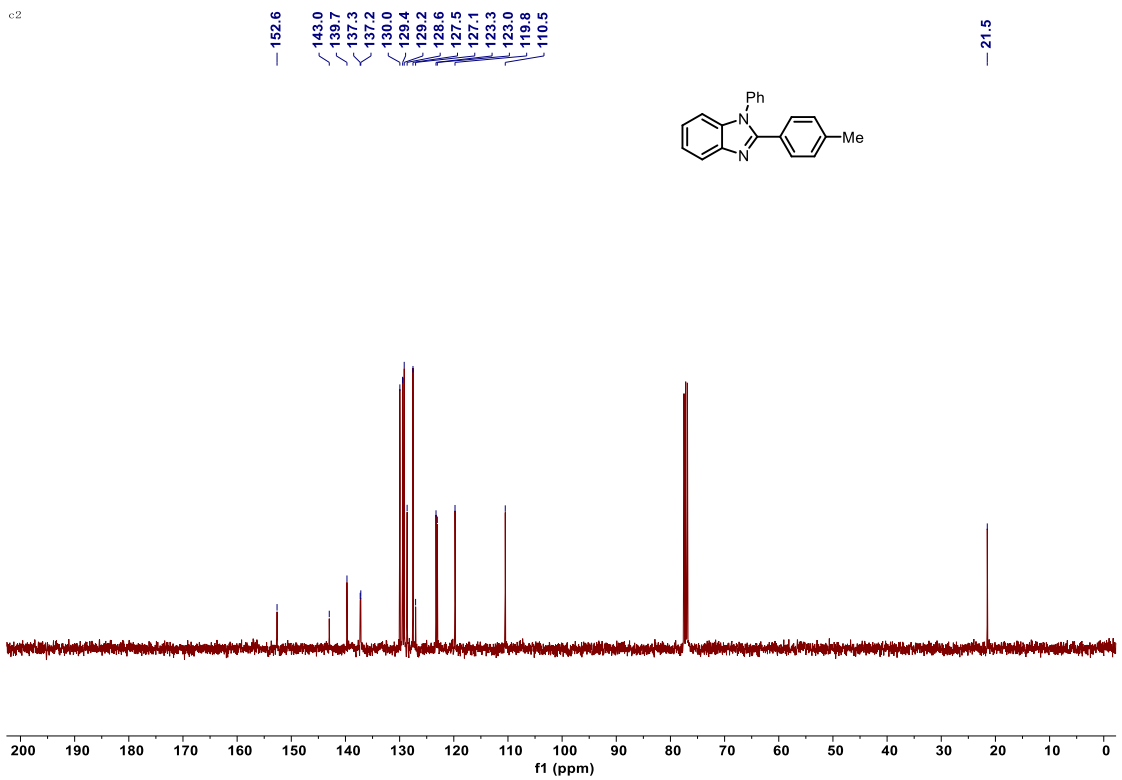

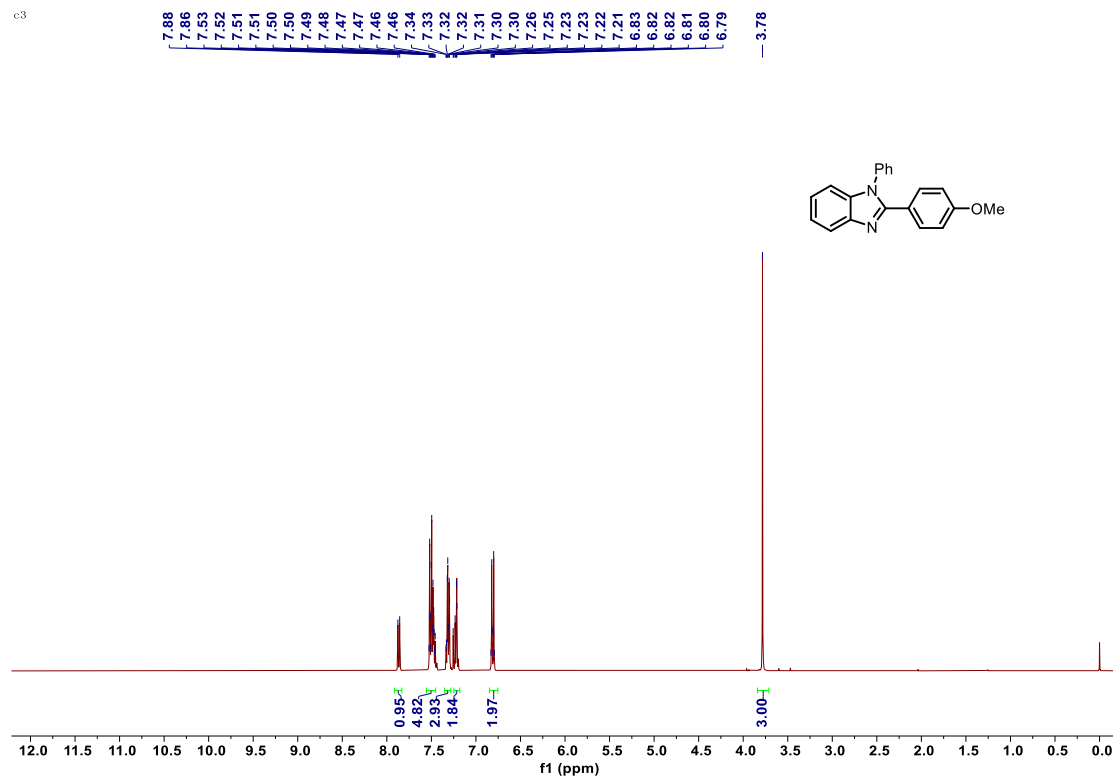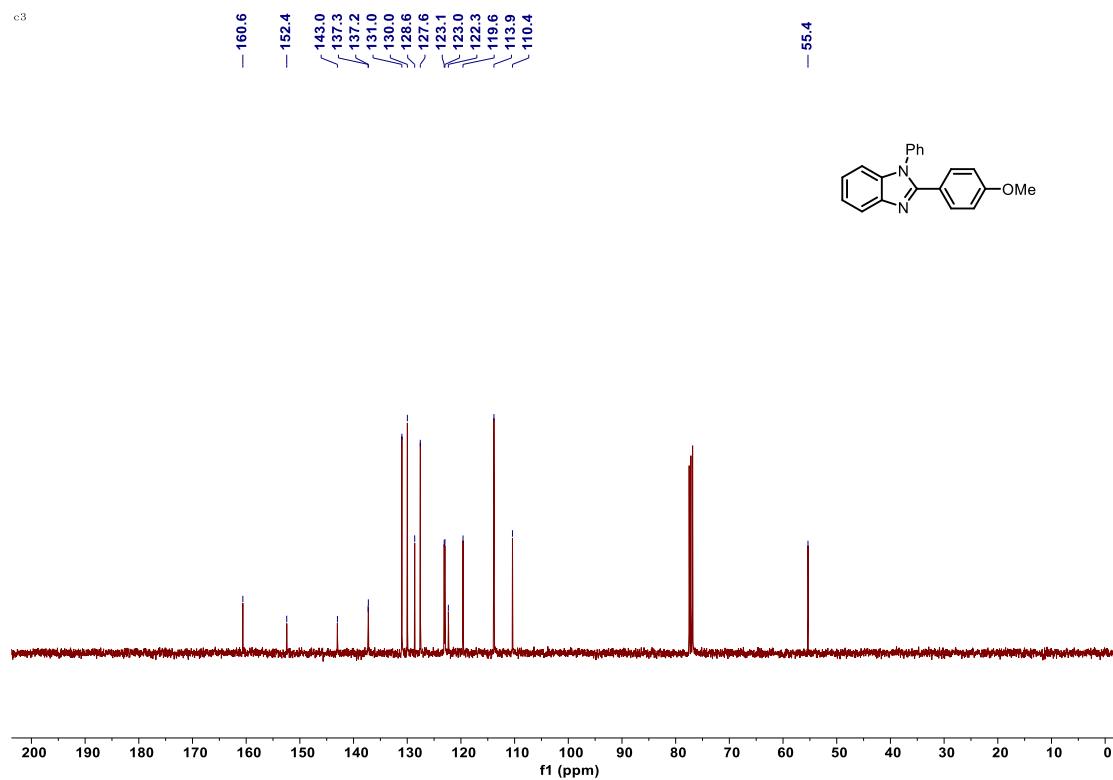

c4

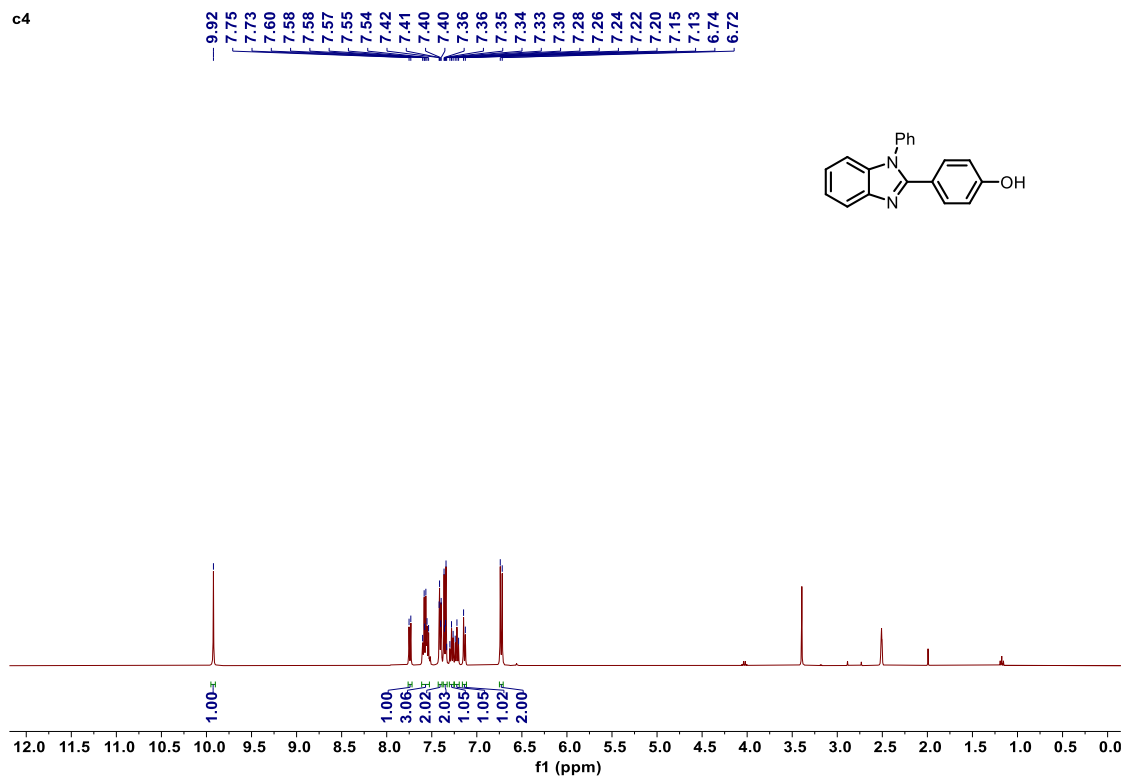

c4

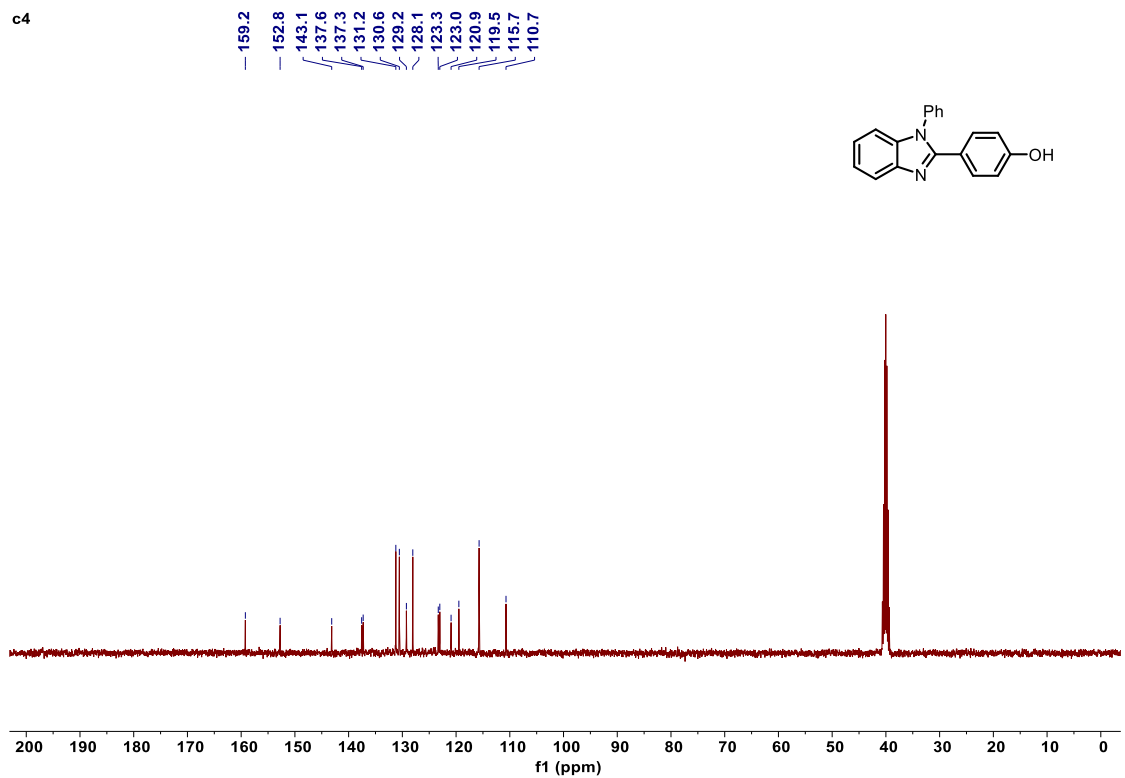

c5

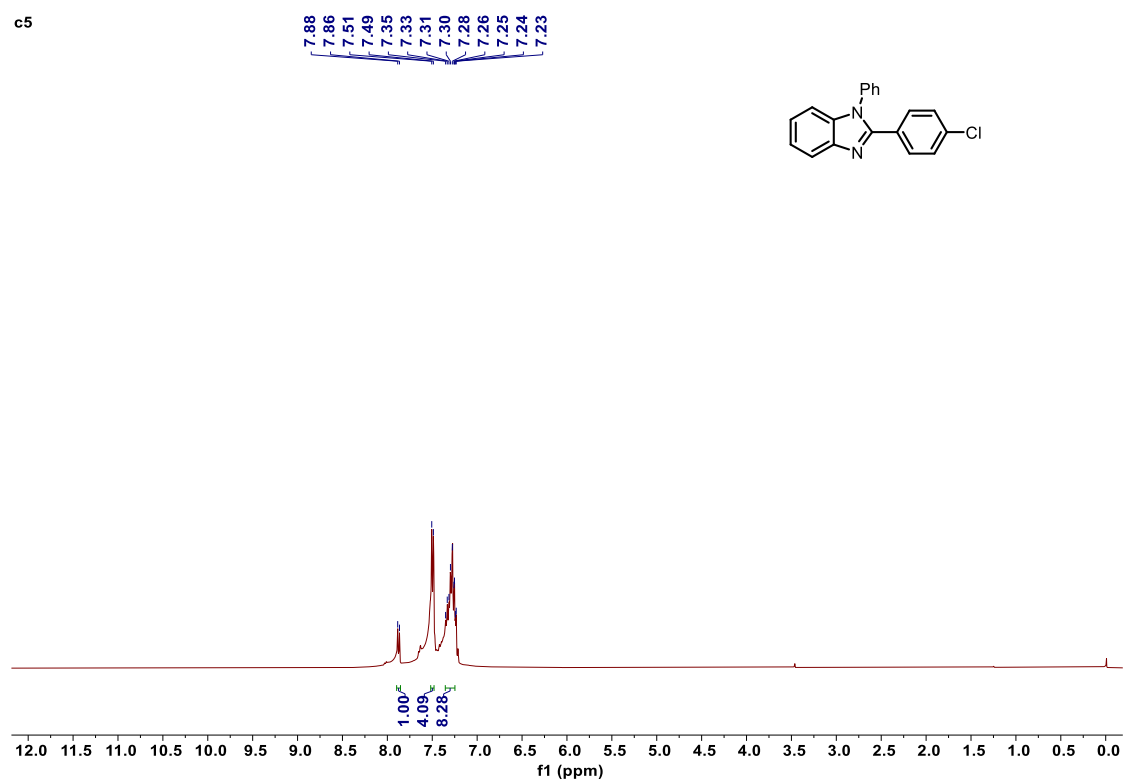

c5

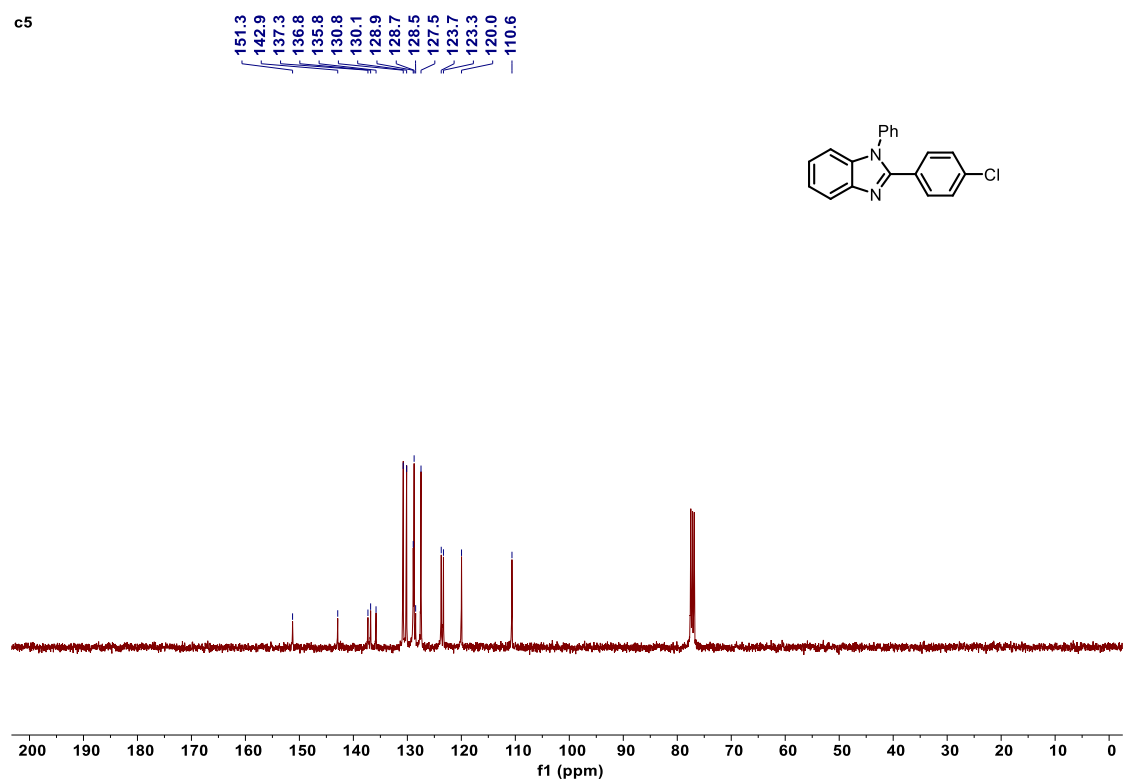

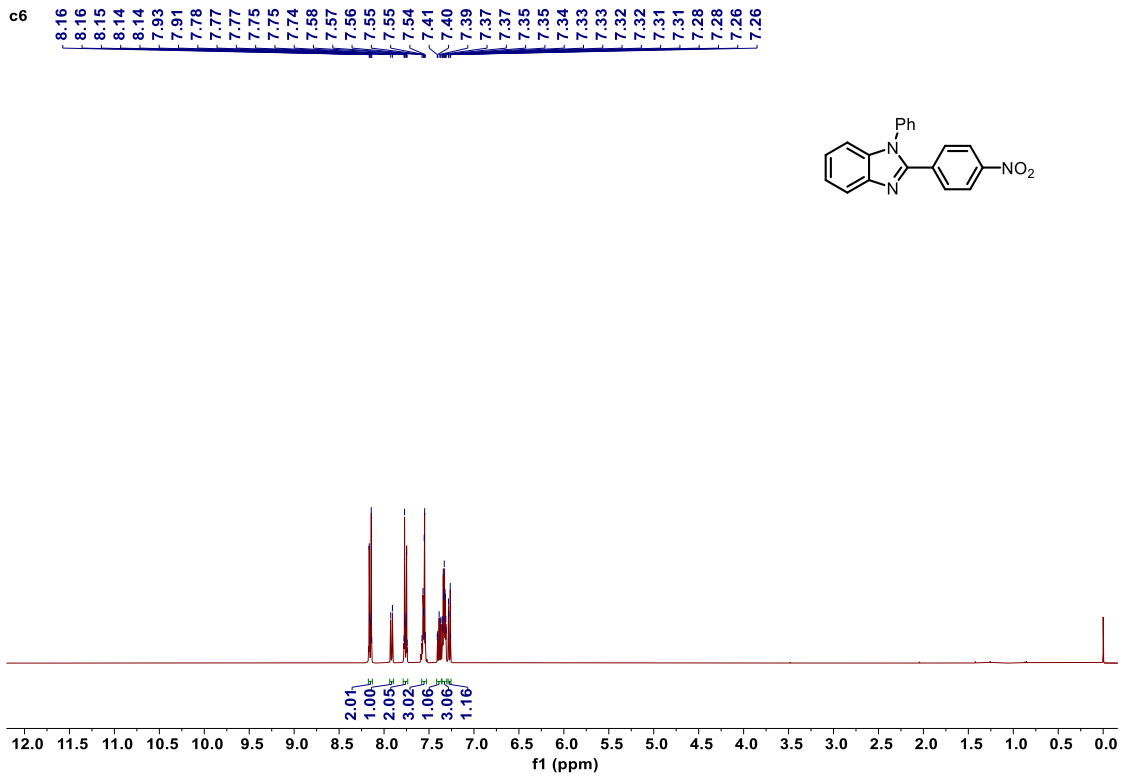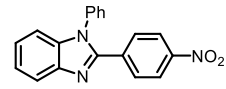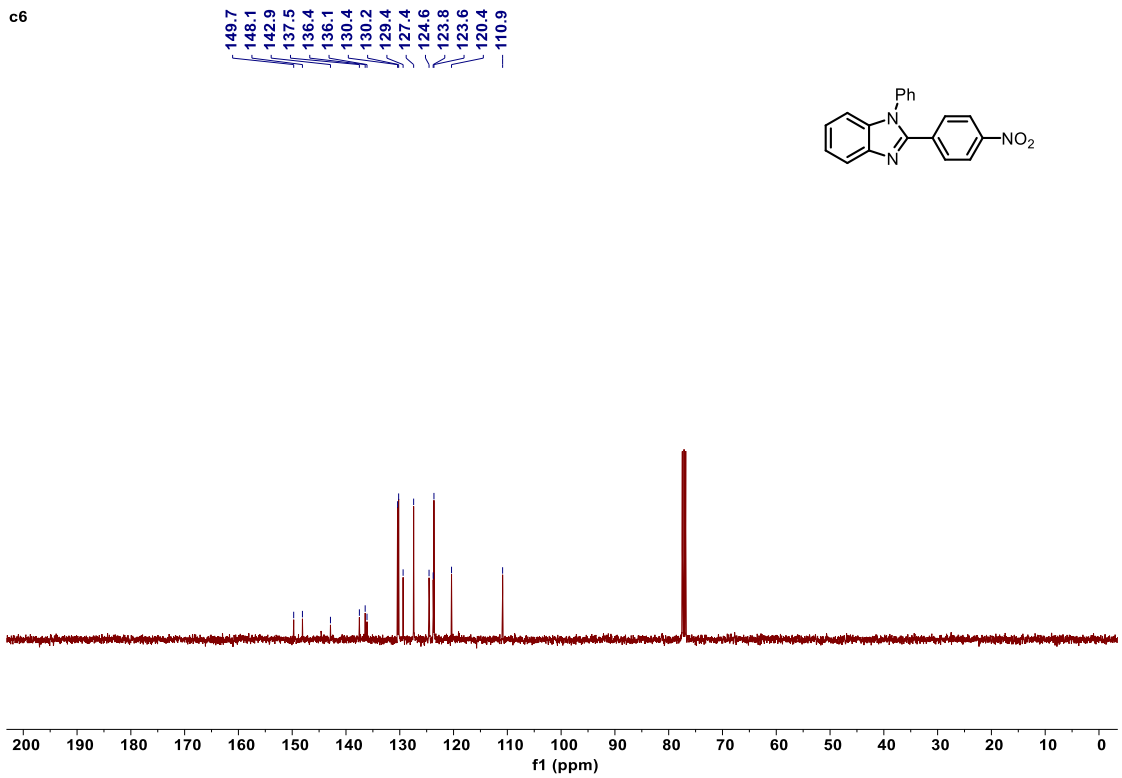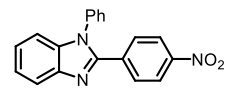

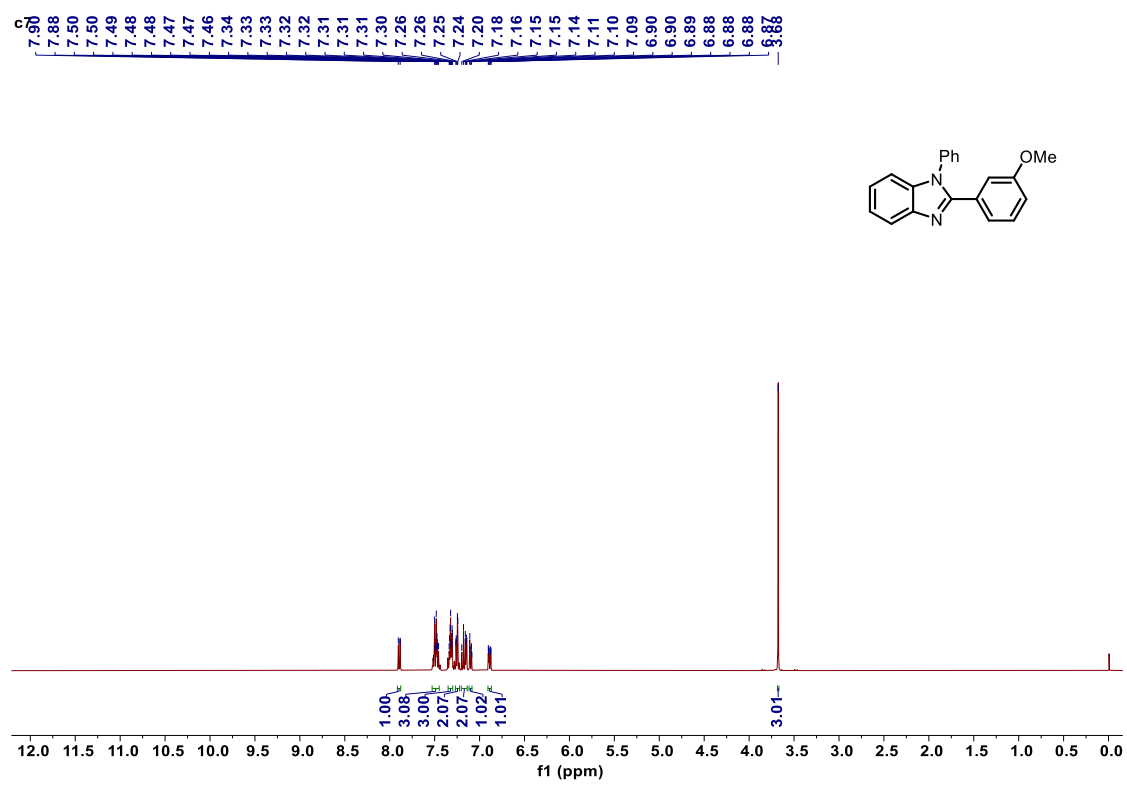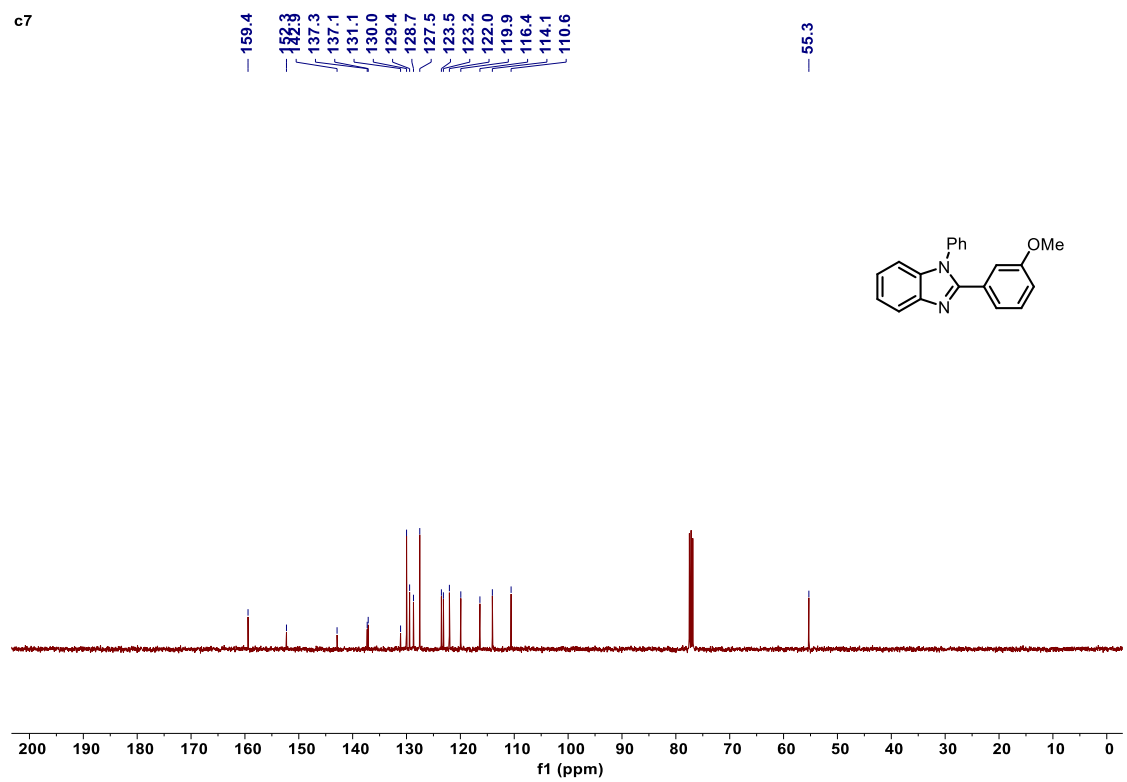

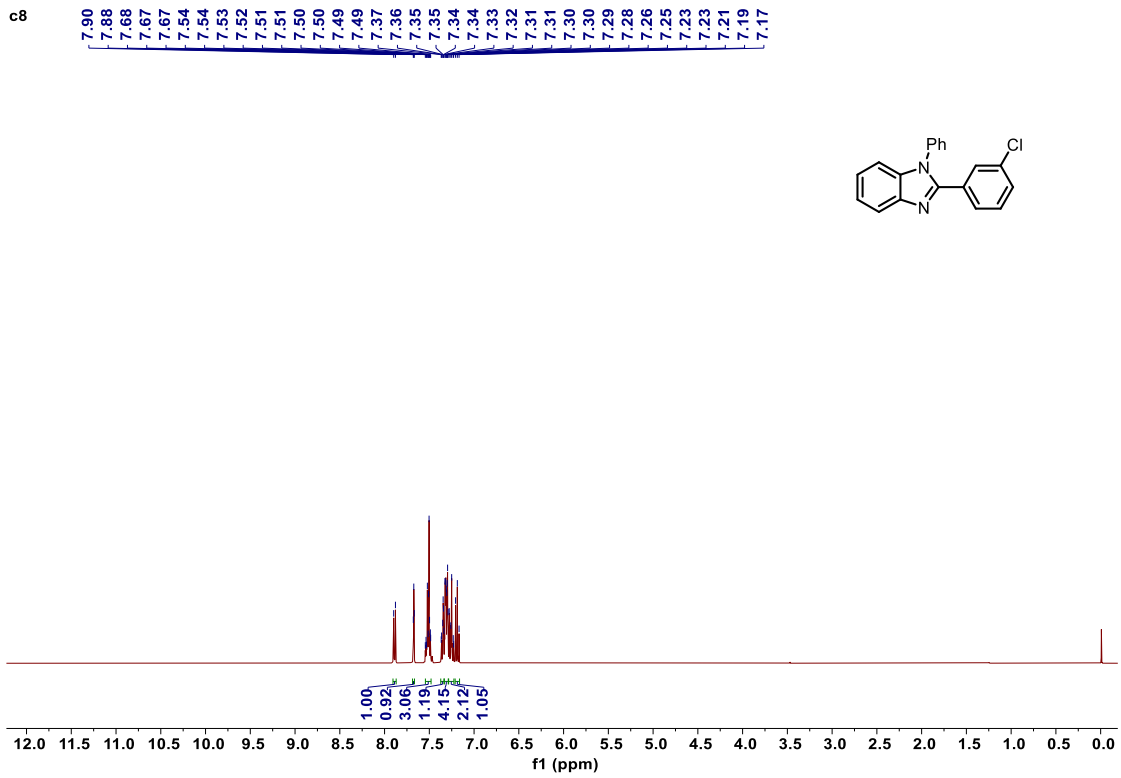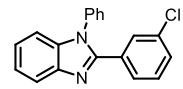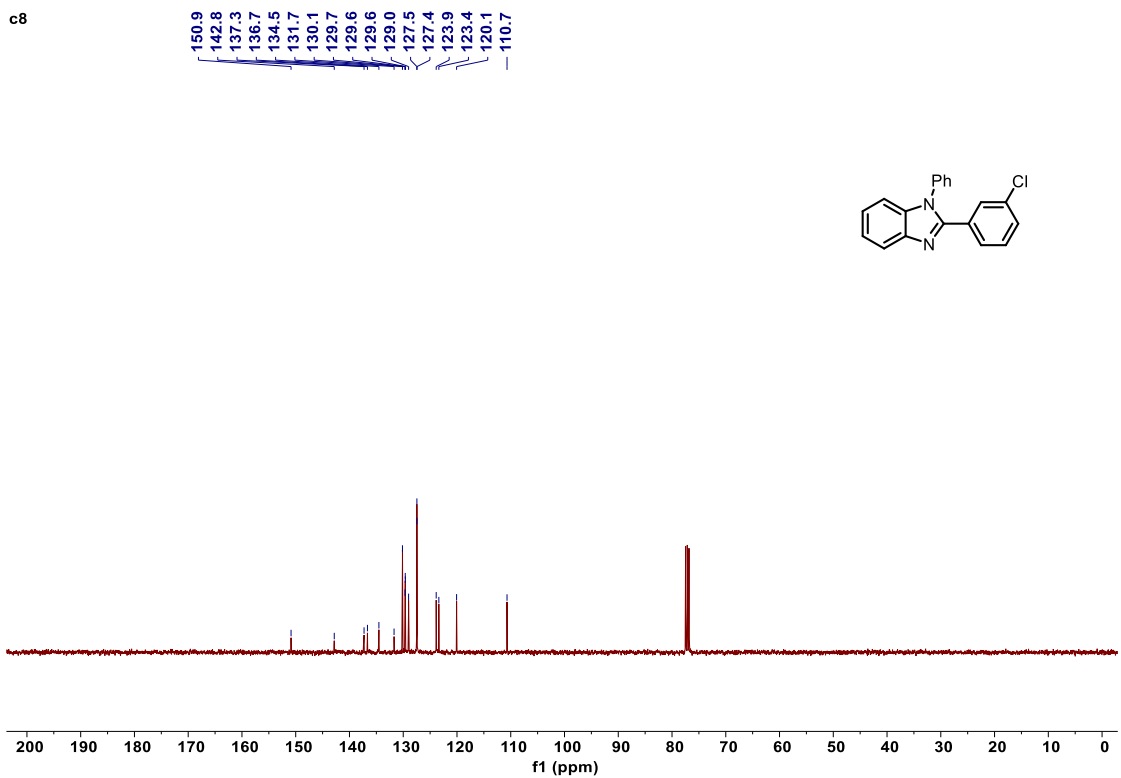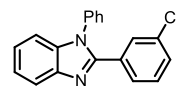

c9

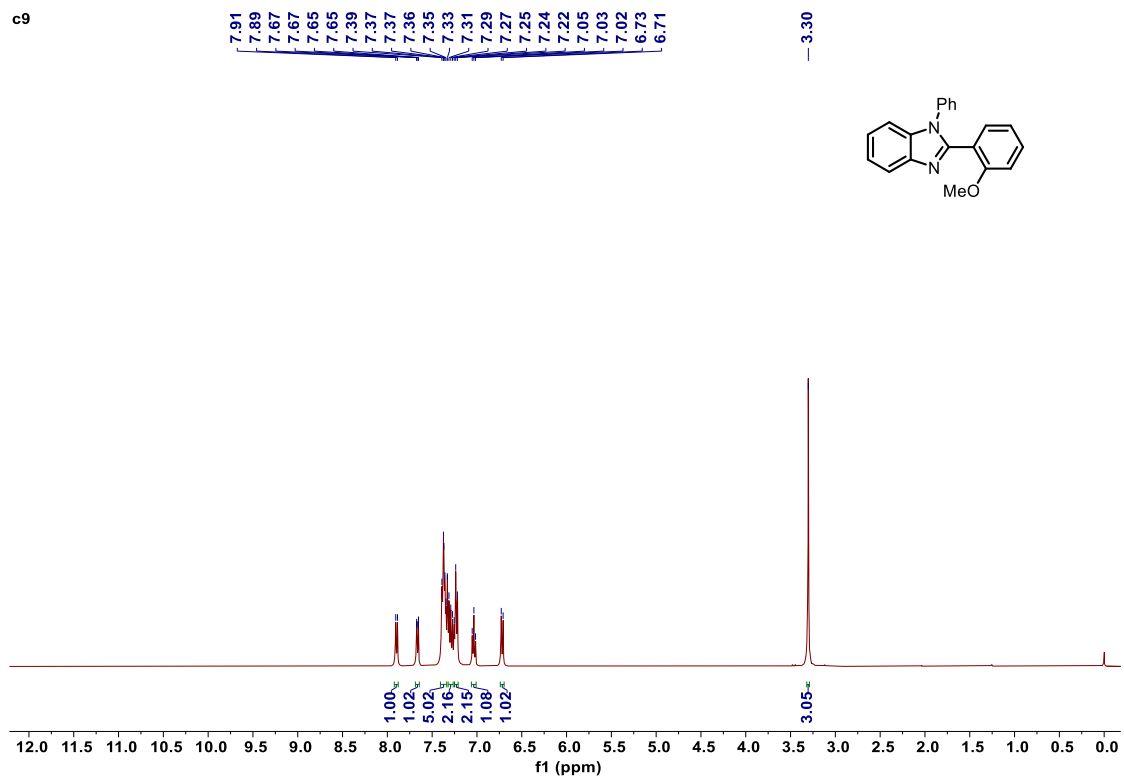

c9

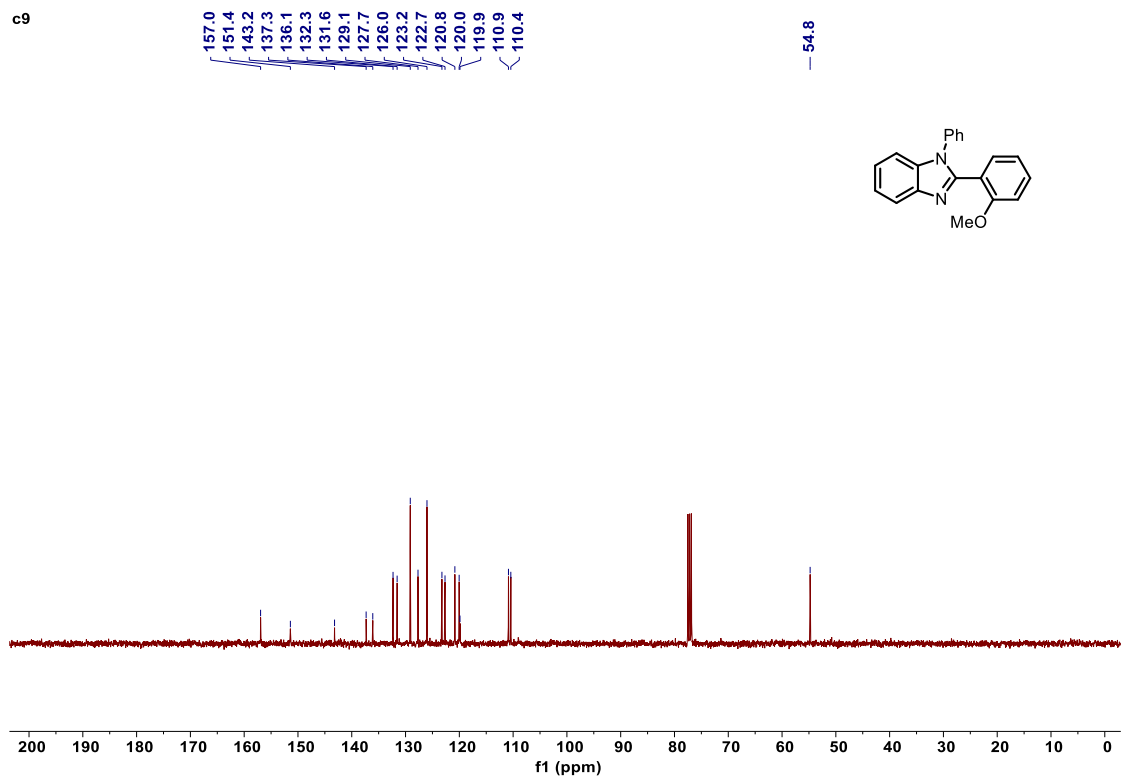

c10

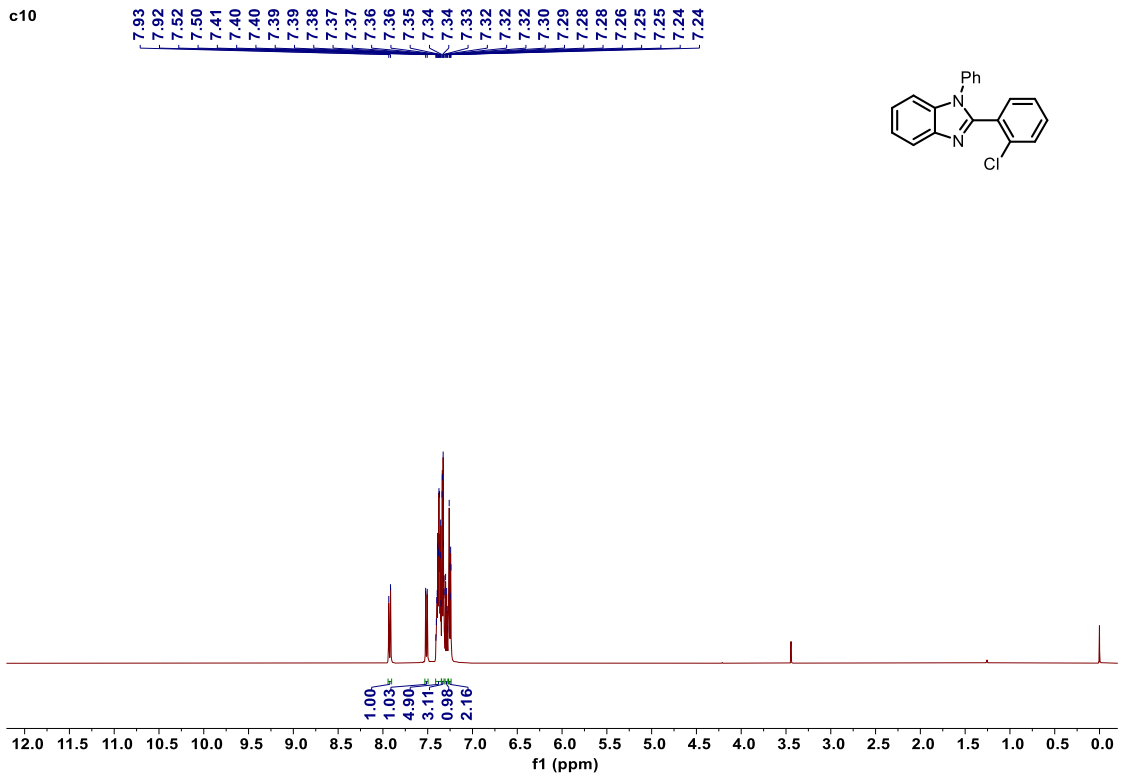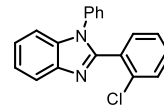

c10

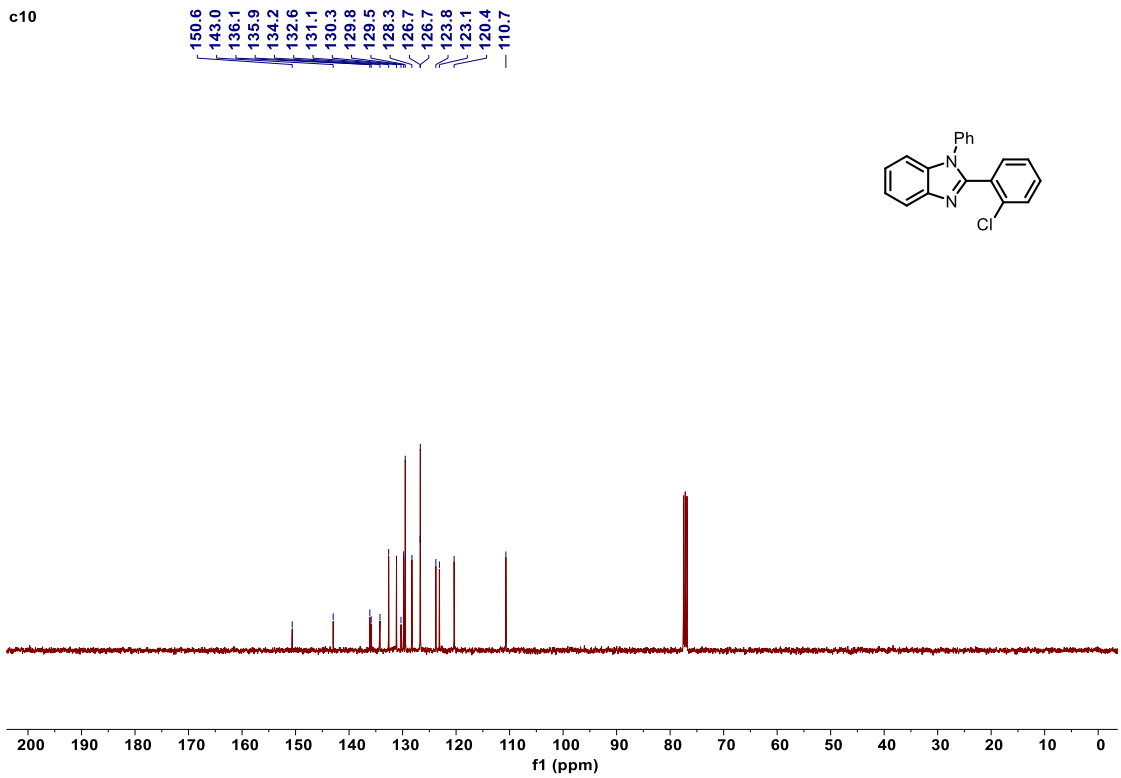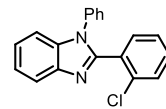

c11

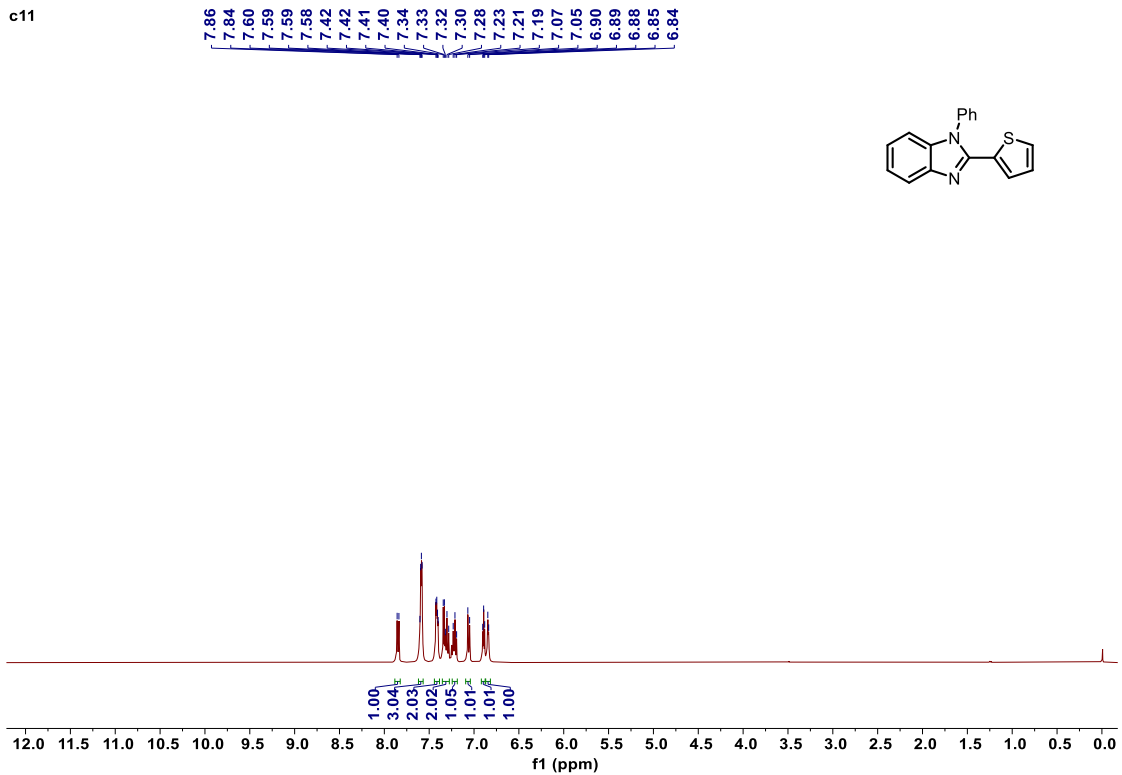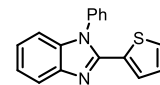

c11

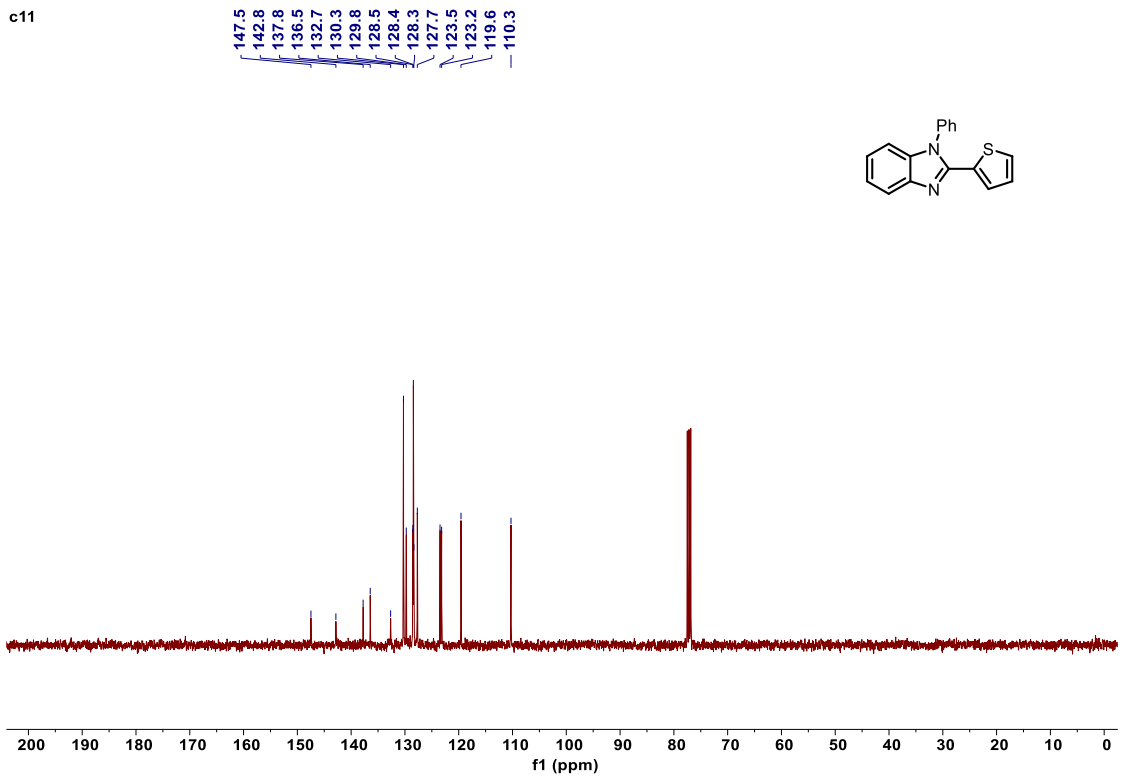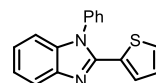

c12

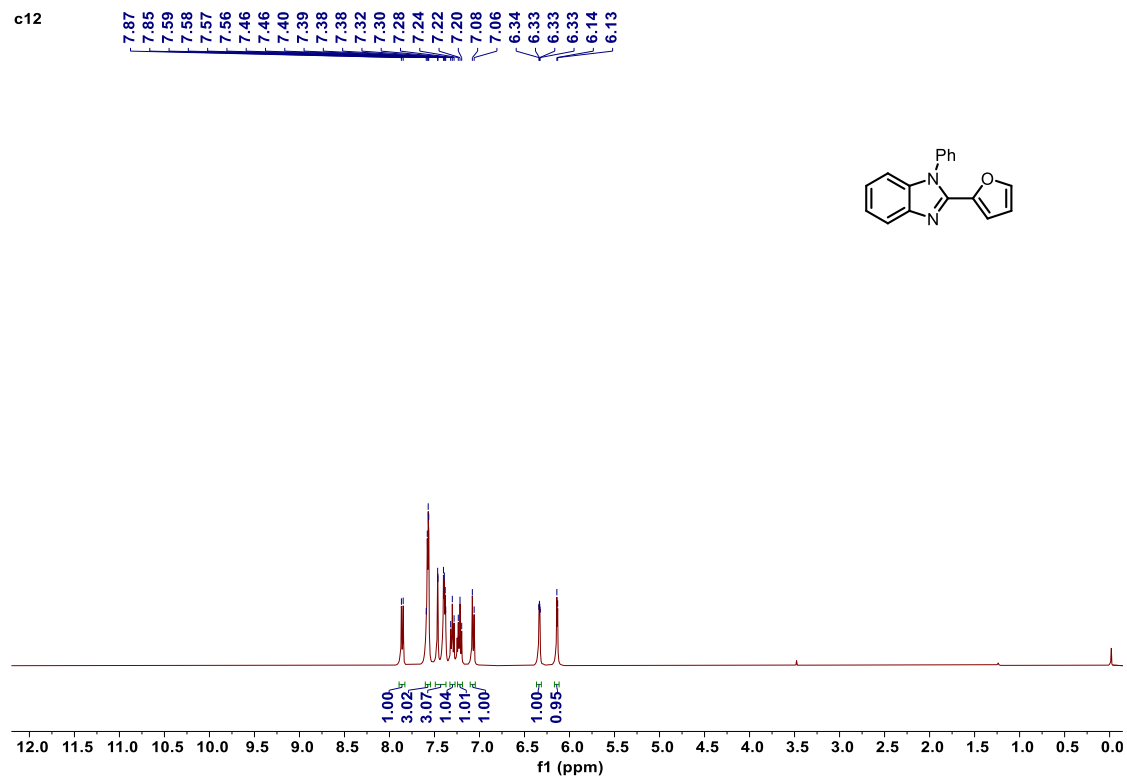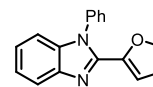

c12

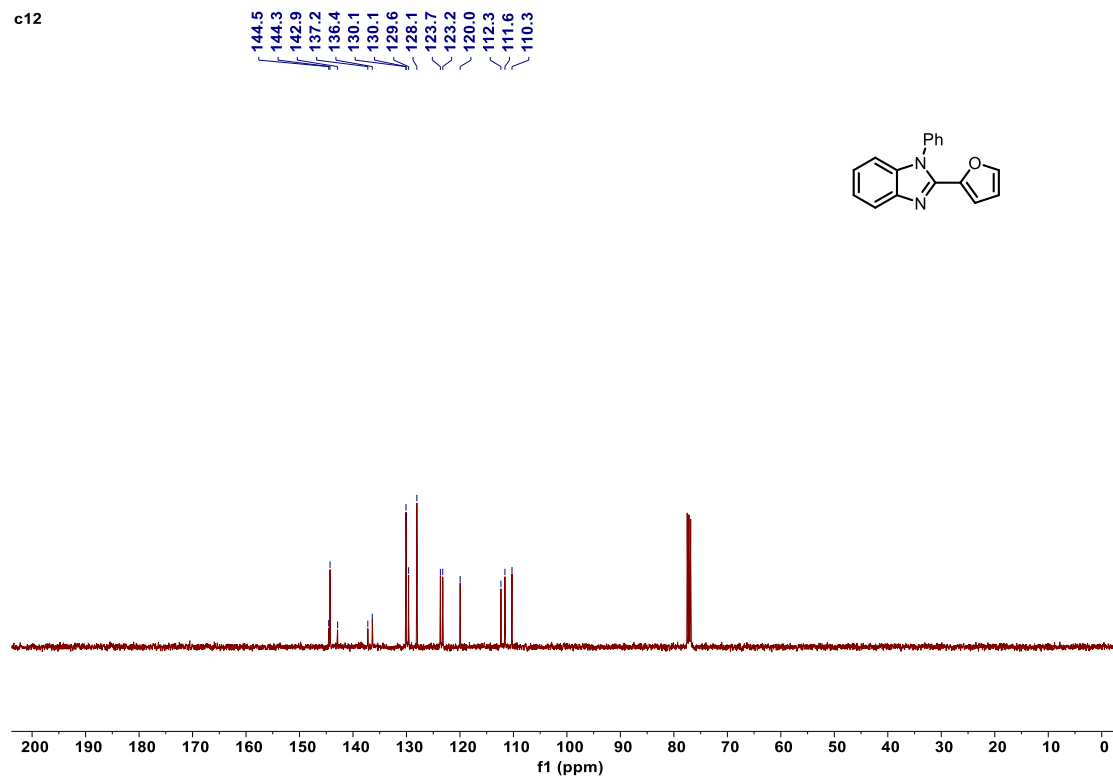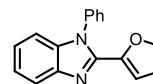

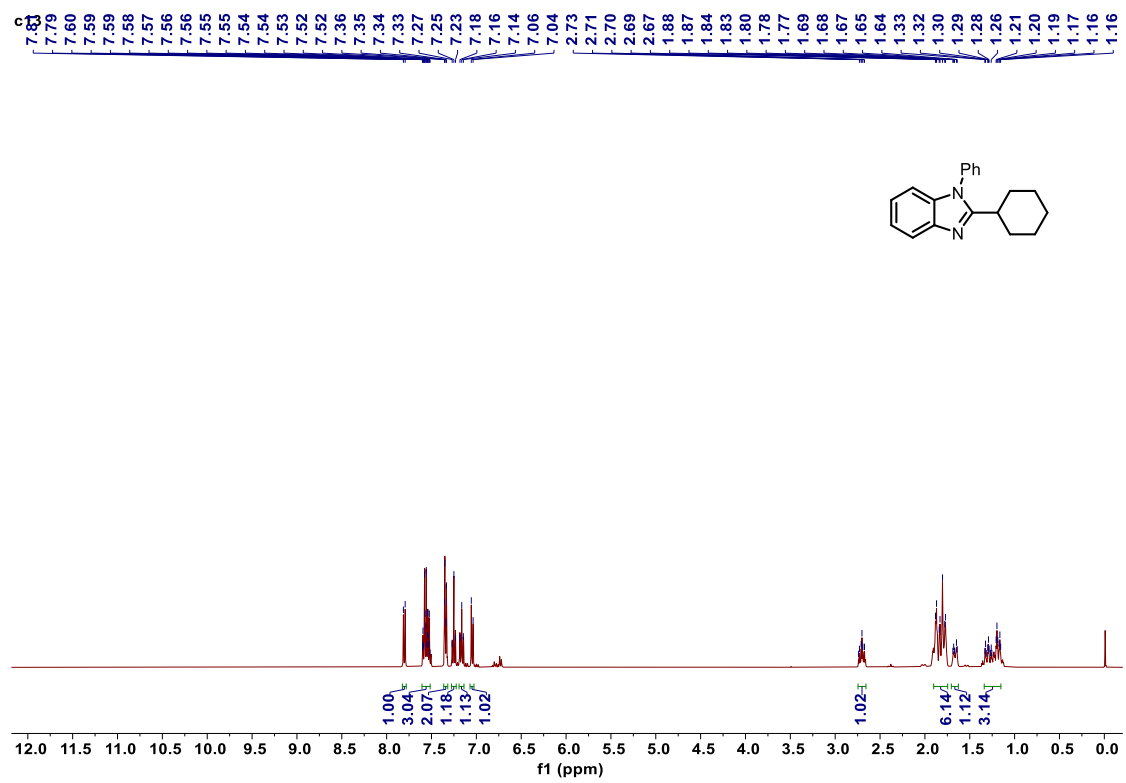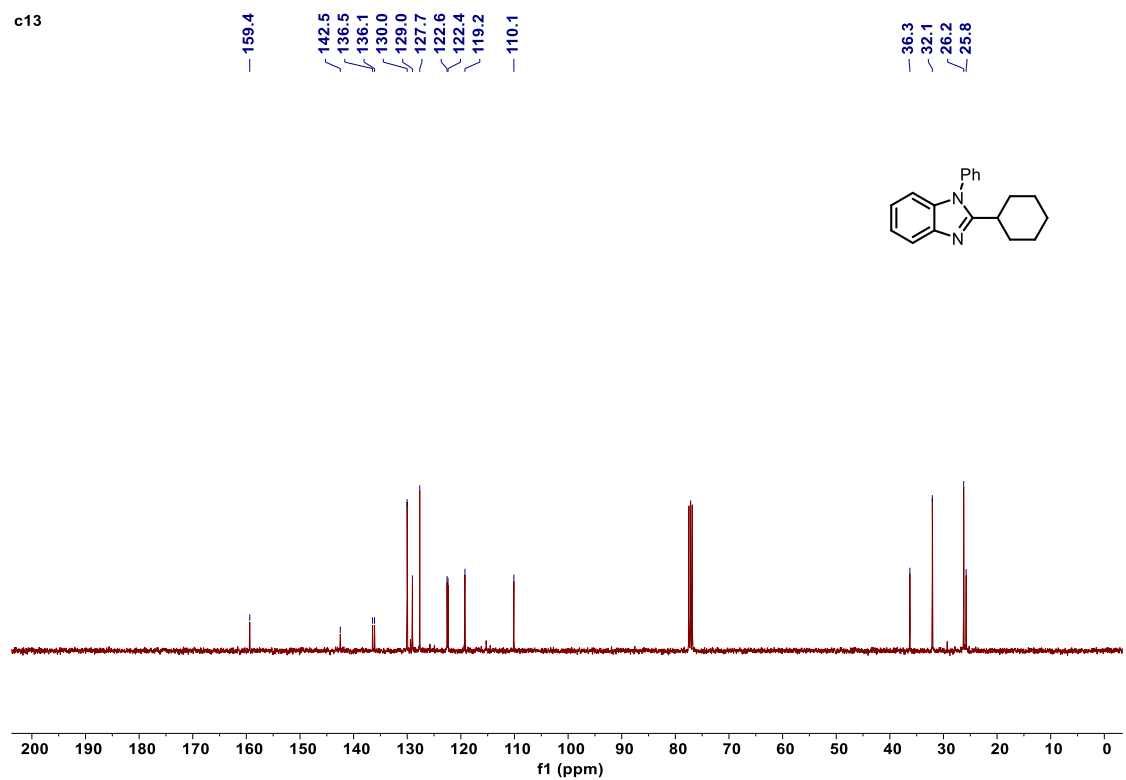

c14

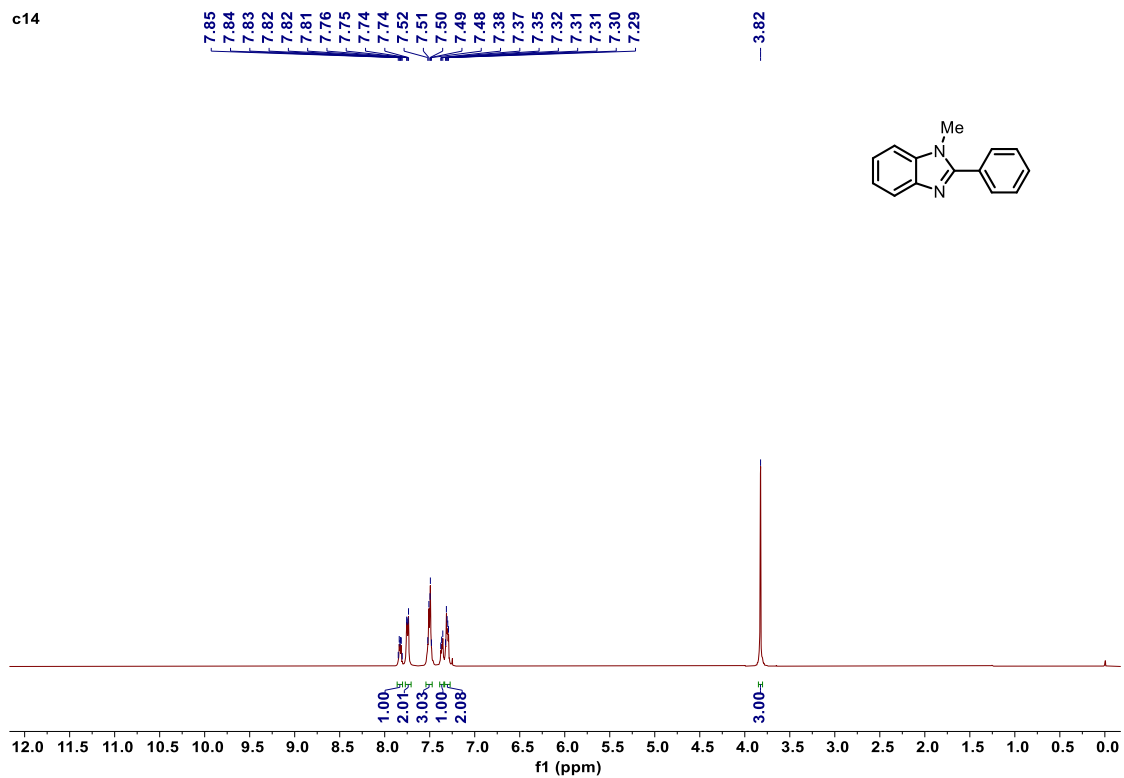

c14

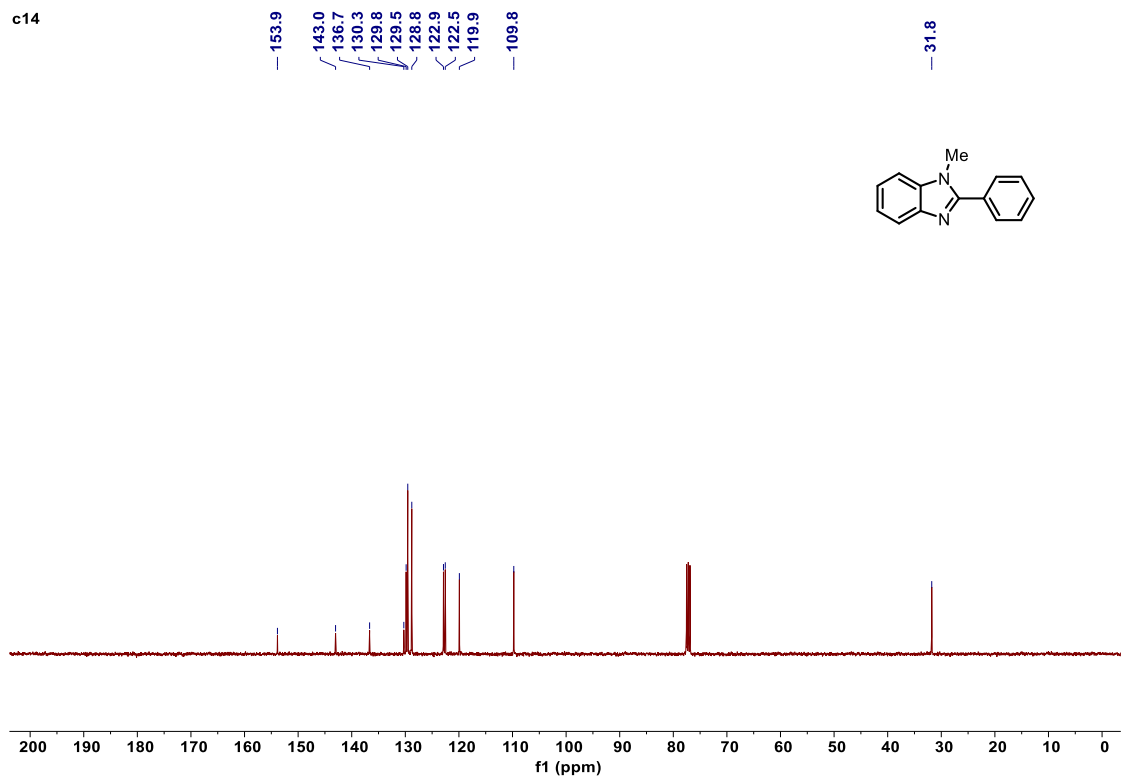

c15

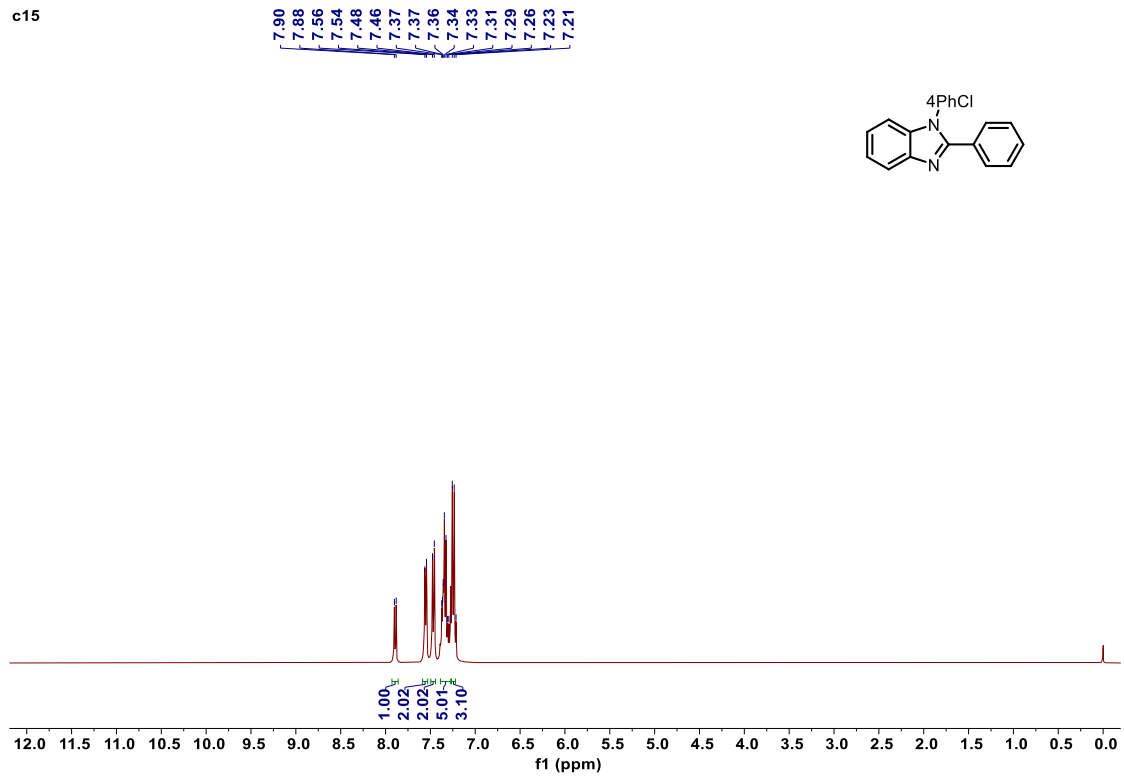

c15

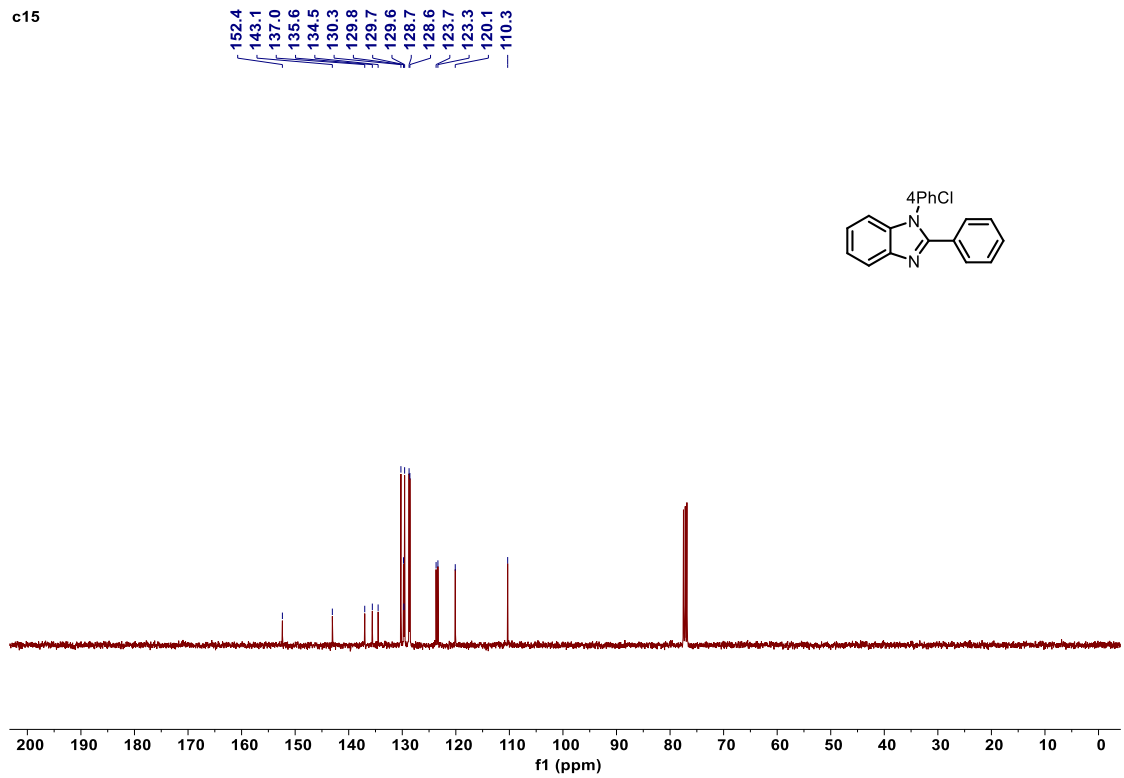

c16

-12.92

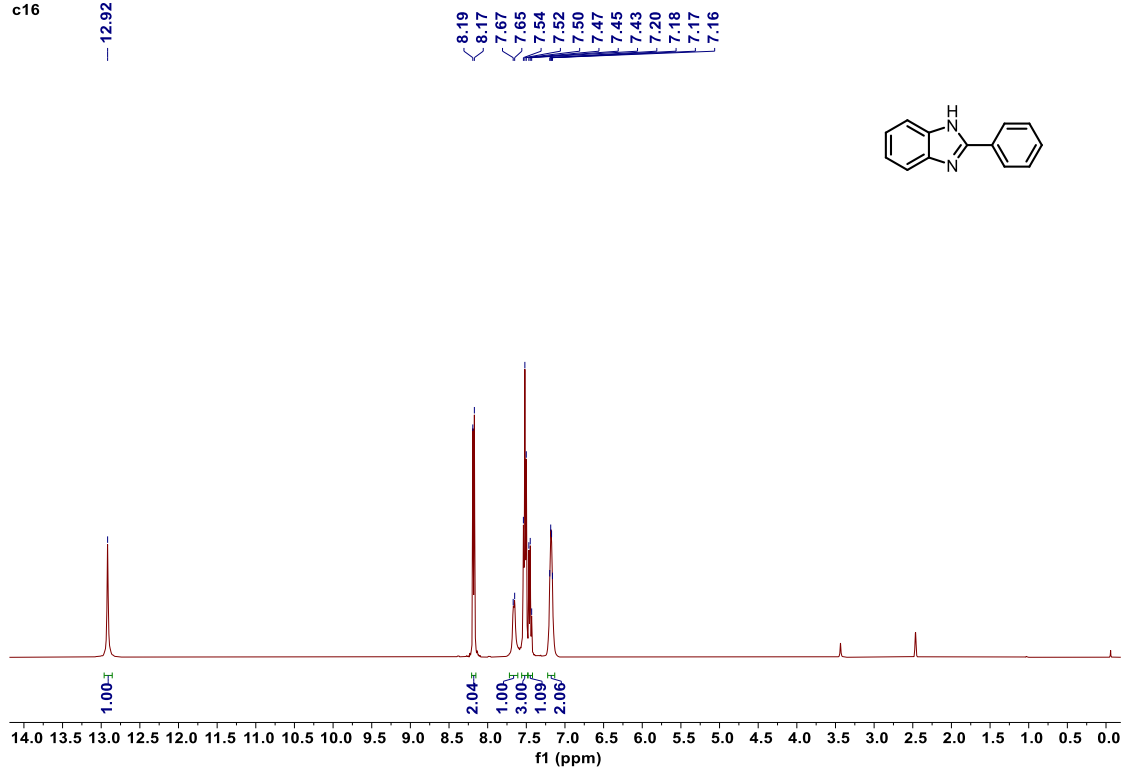

c16

151.8  
144.4  
135.6  
130.7  
130.4  
129.5  
127.0  
123.1  
122.2  
119.4  
111.9

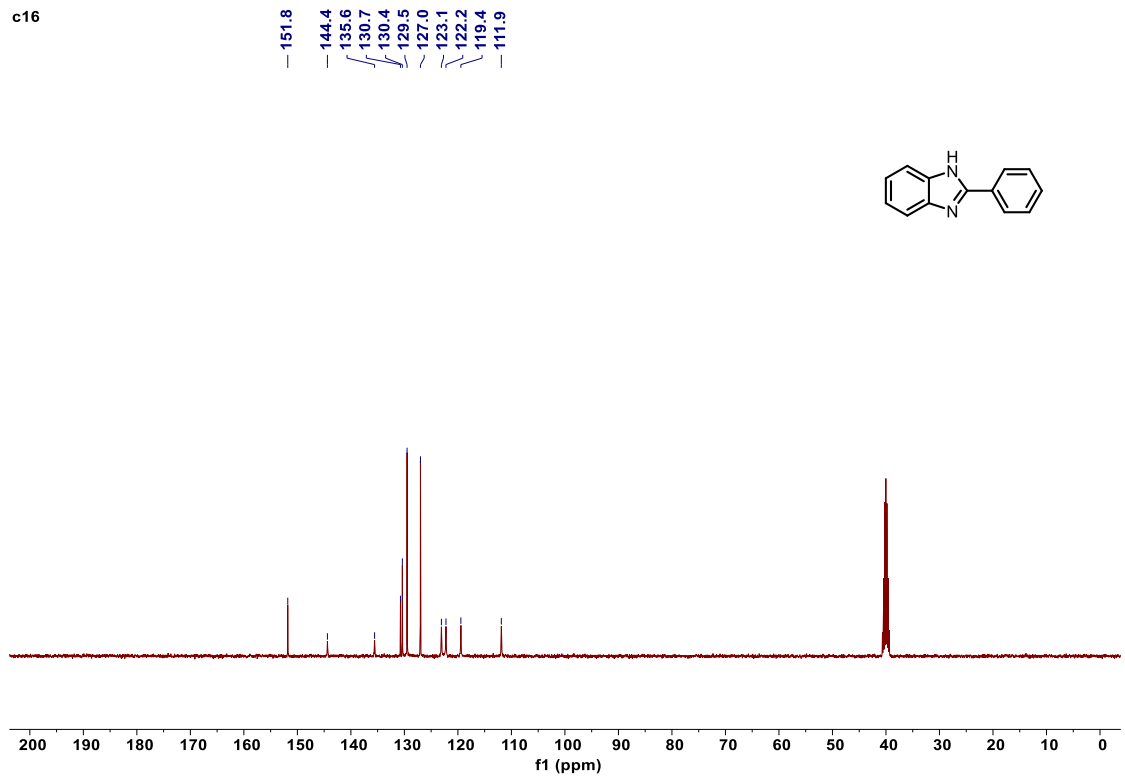

c17

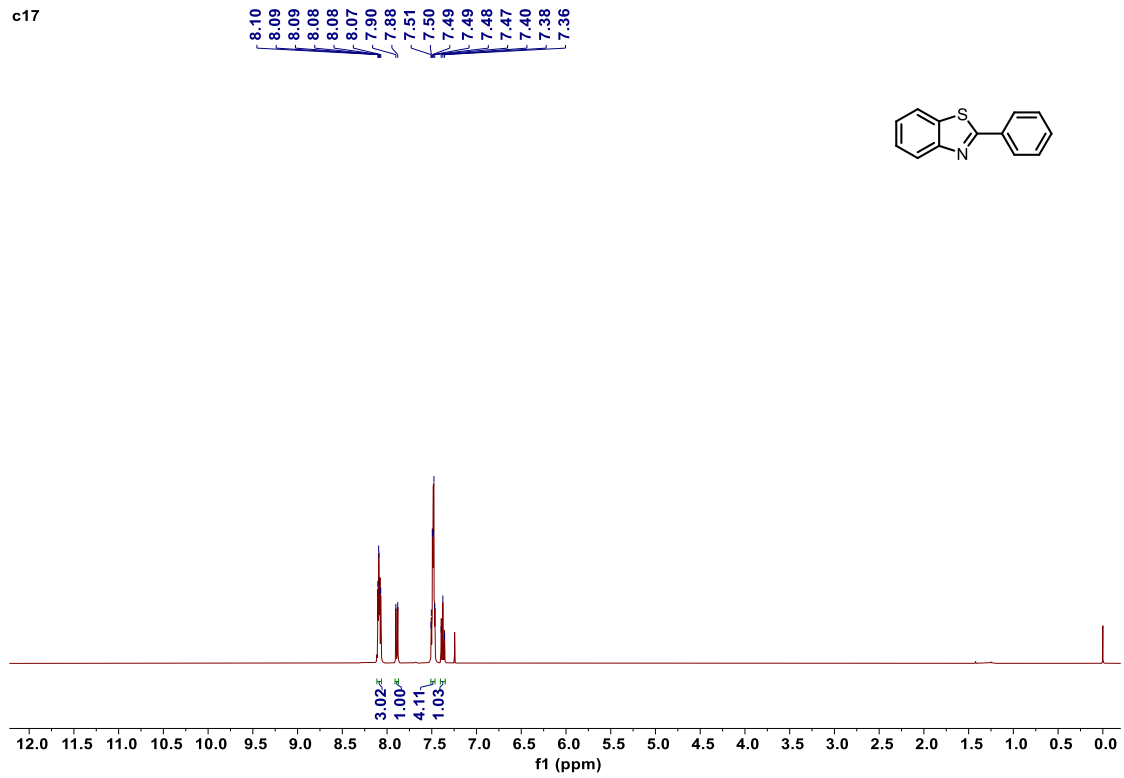

c17

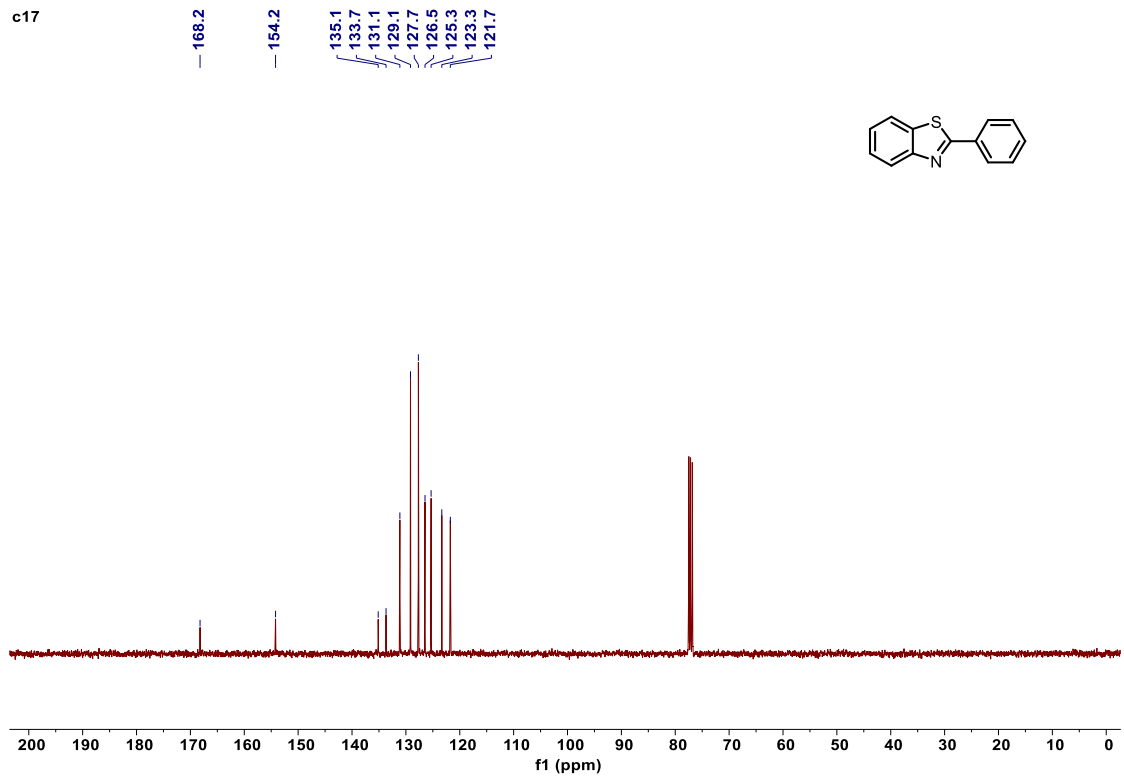

c18

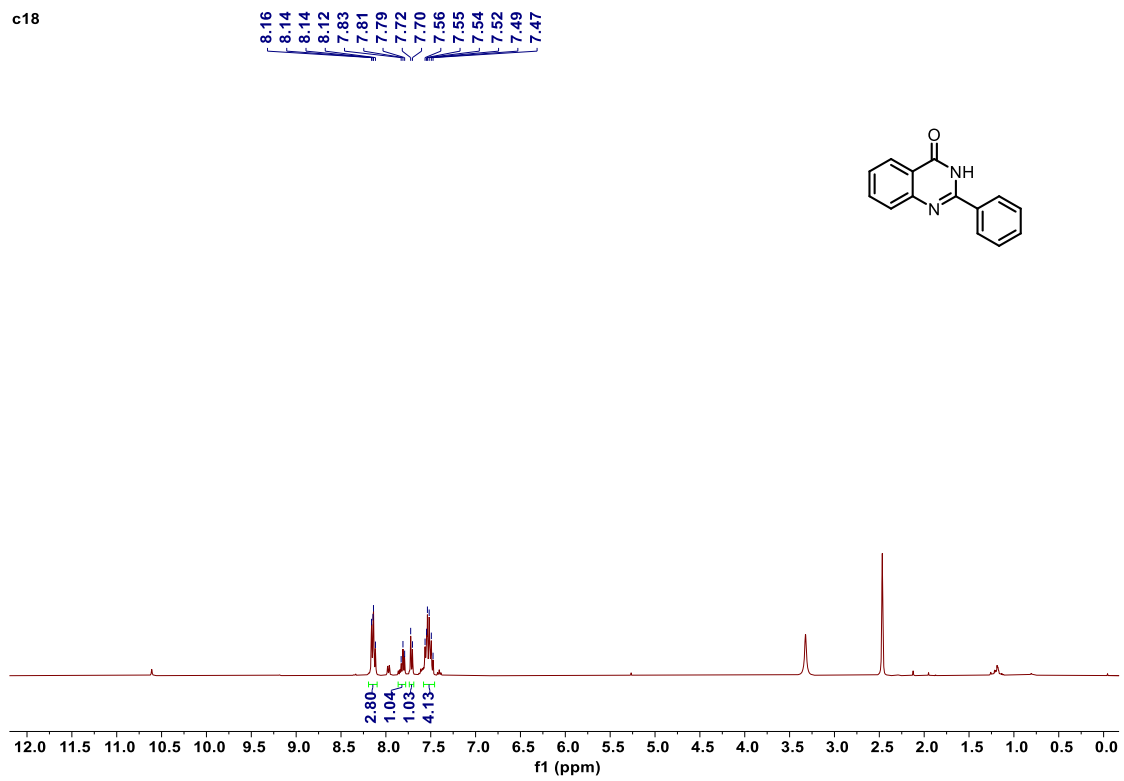

c19

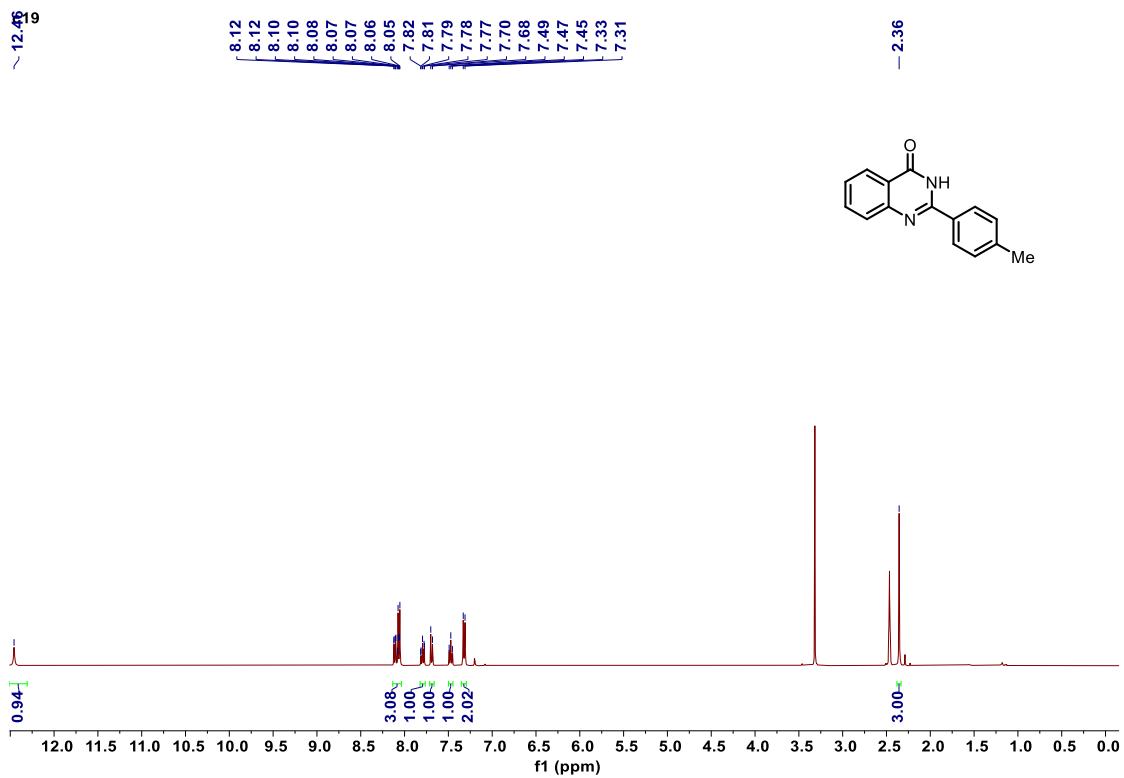

## 9. References

- [1] Frisch, M. J. et al. Gaussian 09, rev. D.01; Gaussian Inc.: Wallingford, CT, **2013**.
- [2] B. Gui, Y. Meng, Y. Xie, J. Tian, G. Yu, W. Zeng, G. Zhang, S. Gong, C. Yang, D. Zhang, C. Wang, *Adv. Mater.* **2018**, *30*, 1802329.
- [3] S. Wu, D. Ren, K. Zhou, H.-L. Xia, X.-Y. Liu, X. Wang, J. Li, *J. Am. Chem. Soc.* **2021**, *143*, 10547-10552.
- [4] W.-Q. Zhang, Q.-Y. Li, J.-Y. Cheng, K. Cheng, X. Yang, Y. Li, X. Zhao, X.-J. Wang, *ACS Appl. Mater. Interfaces* **2017**, *9*, 31352-31356.
- [5] D. G. Patel, F. Feng, Y.-y. Ohnishi, K. A. Abboud, S. Hirata, K. S. Schanze, J. R. Reynolds, *J. Am. Chem. Soc.* **2012**, *134*, 2599-2612.
- [6] H. Liu, S.-Y. Zhao, Q.-Q. Li, X.-S. Li, Y.-J. He, P. Liu, Y.-Y. Wang, J.-L. Li, *J. Mater. Chem. A* **2024**, *12*, 9527-9531.
